# Supplementary material for: Formation of charge-transfer complexes in ionic crystals composed of 1,3-bis(dicyanomethylidene)indan anion and viologens bearing alkyl chains
Source: Royal Society of Chemistry journal article supplement (doi:10.1039/d3ra06782c), 2023-01-01
Supplement: d3ra06782c1.pdf [file d3ra06782c1.pdf]

## Electronic Supplementary Information

### Formation of Charge-Transfer Complexes in Ionic Crystals Composed of 1,3-Bis(dicyanomethylidene)indan Anion and Viologens Bearing Alkyl Chains

Erika Saito, Ryohei Yamakado\*, Taichi Yasuhara, Hiroto Yamaguchi, Shuji Okada and Tsukasa Yoshida\*

*Department of Organic Materials Science, Graduate School of Organic Materials Science, Yamagata University, Yonezawa 992-8510, Japan, Fax: +81 238 26 3741; Tel: +81 238 26 3088; E-mail: yamakado@yz.yamagata-u.ac.jp*

#### Table of Contents

|                                                                    |     |
|--------------------------------------------------------------------|-----|
| <b>1. Synthetic procedures and spectroscopic data</b>              | S2  |
| <b>Fig. S1–S12</b> <sup>1</sup> H and <sup>13</sup> C NMR spectra  | S4  |
| <b>2. X-ray crystallographic data</b>                              | S16 |
| <b>Table S1</b> Crystallographic details                           | S17 |
| <b>Fig. S13–S19</b> Packing diagrams of crystal structures         | S18 |
| <b>Fig. S20</b> Stacking structures of crystal structures          | S20 |
| <b>3. Optical properties</b>                                       | S21 |
| <b>Fig. S21</b> UV/vis absorption and fluorescence spectra in MeOH | S21 |
| <b>Fig. S22</b> Diffuse reflectance spectra                        | S22 |
| <b>4. Thermal properties</b>                                       | S23 |
| <b>Fig. S23</b> DSC curves                                         | S23 |

## 1. Synthetic procedures and spectroscopic data

**General procedures.** Starting materials were purchased from Kanto Chemical, TCI, and Sigma-Aldrich, and used without further purification unless otherwise stated.  $^1\text{H}$  and  $^{13}\text{C}$  nuclear magnetic resonance (NMR) spectroscopies were investigated on JEOL ECX-500 500 MHz and ECZ-600 600 MHz spectrometers using DMSO- $d_6$  ( $\delta$  2.50 and 39.5 for  $^1\text{H}$  and  $^{13}\text{C}$  NMR, respectively) as the internal standards. Ultraviolet (UV)-visible (Vis)-near infrared (NIR) diffuse reflectance spectra were recorded on a JASCO V-750 spectrometer using a 10 mm quartz cell. UV-vis-NIR diffuse reflectance spectra were recorded on a JASCO V-670 spectrometer using powdered samples. Samples were supported on filter paper, which was also used to provide the background reference.

**Typical procedure of the synthesis of 1,1'-dialkyl-4,4'-bipyridinium dihalide ( $\text{C}_n^{2+}\text{-2X}^-$ ).** 4,4'-Bipyridine (1.56 g, 10 mmol) was added to 3 equivalents of alkylhalide (30 mmol) in acetonitrile (20 mL). The mixture was heated at 65 °C to complete dissolution and stirred 48 h. The precipitate in the reaction mixture was filtered and washed with THF. The compound was recrystallized from MeOH.

**1,1'-Dipropyl-4,4'-bipyridinium dibromide ( $\text{C}_3^{2+}\text{-2Br}^-$ ).** Yellow powder, Yield: 62%, M.p.: 287°C.  $^1\text{H}$  NMR (600 MHz, DMSO- $d_6$ ,  $\delta$ ): 0.89 (6H, t,  $J = 7.2$  Hz), 1.99 (4H, td,  $J = 7.2$  Hz), 4.75 (4H, t,  $J = 7.2$  Hz), 8.88 (4H, d,  $J = 6.9$  Hz), 9.52 (4H, d,  $J = 6.9$  Hz).  $^{13}\text{C}$  NMR (126 MHz, DMSO- $d_6$ ,  $\delta$ ): 10.11, 24.11, 61.98, 126.60, 145.64, 148.56.

**1,1'-Dibutyl-4,4'-bipyridinium dibromide ( $\text{C}_4^{2+}\text{-2Br}^-$ ).** Yellow powder, Yield: 61%, M.p.: 284°C.  $^1\text{H}$  NMR (400 MHz, DMSO- $d_6$ ,  $\delta$ ): 0.94 (6H, t,  $J = 7.4$  Hz), 1.33 (4H, td,  $J = 7.4$  Hz), 1.93—2.00 (4H, m), 4.70 (4H, t,  $J = 7.2$  Hz), 8.79 (4H, d,  $J = 6.7$  Hz), 9.40 (4H, d,  $J = 6.7$  Hz).  $^{13}\text{C}$  NMR (126 MHz, DMSO- $d_6$ ,  $\delta$ ): 13.23, 18.70, 32.60, 60.65, 126.63, 145.67, 148.64.

**1,1'-Dipentyl-4,4'-bipyridinium dibromide ( $\text{C}_5^{2+}\text{-2Br}^-$ ).** Yellow powder, Yield: 62%, M.p.: 274°C.  $^1\text{H}$  NMR (500 MHz, DMSO- $d_6$ ,  $\delta$ ): 0.88 (6H, t,  $J = 6.8$  Hz), 1.29—1.37 (8H, m), 1.97—2.02 (4H, m), 4.74 (4H, t,  $J = 7.8$  Hz), 8.82 (4H, d,  $J = 6.5$  Hz), 9.45 (4H, d,  $J = 6.5$  Hz).  $^{13}\text{C}$  NMR (126 MHz, DMSO- $d_6$ ,  $\delta$ ): 13.83, 21.65, 27.57, 30.54, 60.84, 126.72, 145.80, 148.64.

**1,1'-Dihexyl-4,4'-bipyridinium diiodide ( $\text{C}_6^{2+}\text{-2I}^-$ ).** Orange red powder, Yield: 60%, M.p.: 279°C.  $^1\text{H}$  NMR (500 MHz, DMSO- $d_6$ ,  $\delta$ ): 0.84—0.89 (6H, m), 1.27—1.37 (12H, m), 1.93—2.04 (4H, m), 4.698 (4H, t,  $J = 7.5$  Hz), 8.77 (4H, d,  $J = 6.8$  Hz), 9.37 (4H, d,  $J = 6.8$  Hz).  $^{13}\text{C}$  NMR (126 MHz, DMSO- $d_6$ ,  $\delta$ ): 13.73, 21.76, 25.00, 30.48, 60.94, 126.62, 145.62, 148.64.

**Typical procedure of the synthesis of 1,1'-dialkyl-4,4'-bipyridinium 1,3-bis(dicyanomethylidene)indan ( $\text{C}_n^{2+}\text{-2CMI}^-$ ).** To an aqueous solution (1 mM) of 1,3-bis(dicyanomethylidene)indan (60.55 mg, 0.25 mmol), 2.51 mM NaOH aq (pH = 12.4) was added dropwise to be basic condition (pH = 9.6–10.0). To this solution, aqueous solution (125 mL) of 1,1'-dipropyl-4,4'-bipyridinium dihalide (0.125 mmol) was added, and the mixture was stirred for 24 h at r.t.. After removing the solvents, the residue was recrystallized from ethanol to afford  $\text{C}_n^{2+}\text{-2CMI}^-$ .

**1,1'-Dimethyl-4,4'-bipyridinium 1,3-bis(dicyanomethylidene)indan ( $\text{C}_1^{2+}\text{-2CMI}^-$ ).** Deep orange purple powder, Yield 42%, M.p.: 260 °C (decomposition),  $^1\text{H}$  NMR (400 MHz, DMSO- $d_6$ ,  $\delta$ ): 4.43 (6H, s), 5.70 (2H, s), 7.41-7.44 (4H, m), 7.88-7.93 (4H, m), 8.74 (4H, d,  $J = 6.7$  Hz), 9.27 (4H, d,  $J = 6.7$  Hz).  $^{13}\text{C}$  NMR (126 MHz, DMSO- $d_6$ ,  $\delta$ ): 47.91, 50.26, 102.70, 117.69, 117.80, 121.44, 125.92, 130.01, 137.78, 146.51, 148.08, 158.05.

**1,1'-Diethyl-4,4'-bipyridinium 1,3-bis(dicyanomethylidene)indan ( $\text{C}_2^{2+}\text{-2CMI}^-$ ).** Dark green powder, Yield 42%, M.p.: 243 °C,  $^1\text{H}$  NMR (500 MHz, DMSO- $d_6$ ,  $\delta$ ): 1.61 (6H, t,  $J = 7.0$  Hz), 4.72 (4H, q,  $J = 7.3$  Hz), 5.70 (2H, s), 7.41-7.43 (4H, m), 7.89-7.92 (4H, m), 8.75 (4H, d,  $J = 6.3$  Hz), 9.37 (4H, d,  $J = 6.3$  Hz).  $^{13}\text{C}$  NMR (126 MHz, DMSO- $d_6$ ,  $\delta$ ): 16.36, 50.40, 56.61, 102.76, 117.85, 117.94, 121.60, 126.50, 130.18, 137.82, 145.62, 148.47, 158.16.

**1,1'-Dipropyl-4,4'-bipyridinium 1,3-bis(dicyanomethylidene)indan ( $\text{C}_3^{2+}\text{-2CMI}^-$ ).** Deep purple powder, Yield 40%, M.p.: 242 °C,  $^1\text{H}$  NMR (500 MHz, DMSO- $d_6$ ,  $\delta$ ): 0.94 (6H, t,  $J = 7.5$  Hz), 1.99-2.04 (4H, m), 4.66 (4H, t,  $J = 7.0$  Hz), 5.70 (2H, s), 7.41-7.42 (4H, m), 7.90-7.91 (4H, m), 8.76 (4H,

d,  $J = 7.0$  Hz), 9.35 (4H, d,  $J = 7.0$  Hz).  $^{13}\text{C}$  NMR (126 MHz, DMSO- $d_6$ ,  $\delta$ ): 10.08, 24.02, 50.24, 62.20, 102.65, 117.67, 117.79, 121.43, 126.47, 129.95, 137.77, 145.60, 148.57, 158.04.

**1,1'-Dibutyl-4,4'-bipyridinium 1,3-bis(dicyanomethylidene)indan (C4<sup>2+</sup>-2CMI<sup>-</sup>)**. Deep purple powder, Yield 44%, M.p.: 236 °C,  $^1\text{H}$  NMR (500 MHz, DMSO- $d_6$ ,  $\delta$ ): 0.94 (6H, t,  $J = 7.2$  Hz), 1.30-1.36 (4H, m), 1.92-1.98 (4H, m), 4.68 (4H, t,  $J = 7.6$  Hz), 5.70 (2H, s), 7.42-7.44 (4H, m), 7.90-7.92 (4H, m), 8.77 (4H, d,  $J = 7.0$  Hz), 9.37 (4H, d,  $J = 7.0$  Hz).  $^{13}\text{C}$  NMR (100 MHz, DMSO- $d_6$ ,  $\delta$ ): 13.15, 18.66, 32.52, 50.25, 60.66, 102.64, 117.68, 117.78, 121.43, 126.49, 129.95, 137.78, 145.61, 148.53, 158.03.

**1,1'-Dipentyl-4,4'-bipyridinium 1,3-bis(dicyanomethylidene)indan (C5<sup>2+</sup>-2CMI<sup>-</sup>)**. Deep purple powder, Yield 40%, M.p.: 228 °C,  $^1\text{H}$  NMR (400 MHz, DMSO- $d_6$ ,  $\delta$ ): 0.89 (6H, t,  $J = 7.0$  Hz), 1.25-1.36 (8H, m), 1.93-2.03 (4H, m), 4.68 (4H, t,  $J = 7.6$  Hz), 5.71 (2H, s), 7.40-7.44 (4H, m), 7.88-7.94 (4H, m), 8.77 (4H, d,  $J = 7.2$  Hz), 9.37 (4H, d, 7.2 Hz).  $^{13}\text{C}$  NMR (126 MHz, DMSO- $d_6$ ,  $\delta$ ): 13.78, 21.66, 27.63, 30.55, 50.47, 61.00, 102.82, 117.89, 117.98, 121.61, 126.50, 130.15, 137.86, 145.76, 148.51, 158.16.

**1,1'-Dihexyl-4,4'-bipyridinium 1,3-bis(dicyanomethylidene)indan (C6<sup>2+</sup>-2CMI<sup>-</sup>)**. Dark purple powder, Yield 39%, M.p.: 184 °C,  $^1\text{H}$  NMR (400 MHz, DMSO- $d_6$ ,  $\delta$ ): 0.87 (6H, t,  $J = 7.0$  Hz), 1.27-1.35 (12H, m), 1.93-2.02 (4H, m), 4.68 (4H, t,  $J = 7.2$  Hz), 5.71 (2H, s), 7.39-7.45 (4H, m), 7.88-7.93 (4H, m), 8.76 (4H, d,  $J = 6.8$  Hz), 9.37 (4H, d,  $J = 6.8$  Hz).  $^{13}\text{C}$  NMR (126 MHz, DMSO- $d_6$ ,  $\delta$ ): 13.74, 21.82, 25.29, 27.92, 30.89, 50.27, 60.92, 102.64, 117.70, 117.81, 121.45, 126.43, 130.03, 137.80, 145.60, 148.53, 158.07.

**1,1'-Diheptyl-4,4'-bipyridinium 1,3-bis(dicyanomethylidene)indan (C7<sup>2+</sup>-22CMI<sup>-</sup>)**. Black powder, Yield 40%, M.p.: 153 °C,  $^1\text{H}$  NMR (500 MHz, DMSO- $d_6$ ,  $\delta$ ): 0.86 (6H, t,  $J = 7.0$  Hz), 1.21-1.36 (16H, m), 1.96-2.08 (4H, m), 4.67 (4H, t,  $J = 7.5$  Hz), 5.70 (2H, s), 7.41-7.43 (4H, m), 7.89-7.91 (4H, m), 8.77 (4H, d,  $J = 6.3$  Hz), 9.37 (4H, d,  $J = 6.3$  Hz).  $^{13}\text{C}$  NMR (126 MHz, DMSO- $d_6$ ,  $\delta$ ): 13.93, 21.98, 25.40, 28.08, 30.77, 31.03, 50.39, 60.94, 102.74, 117.84, 117.93, 121.59, 126.58, 130.17, 137.83, 145.74, 148.57, 158.16.

**1,1'-Dioctyl-4,4'-bipyridinium 1,3-bis(dicyanomethylidene)indan (C8<sup>2+</sup>-2CMI<sup>-</sup>)**. Dark purple powder, Yield 39%, M.p.: 132 °C,  $^1\text{H}$  NMR (500 MHz, DMSO- $d_6$ ,  $\delta$ ): 0.85 (6H, t,  $J = 7.0$  Hz), 1.20-1.39 (22H, m), 1.92-2.02 (4H, m), 4.67 (4H, t,  $J = 7.3$  Hz), 5.70 (2H, s), 7.39-7.44 (4H, m), 7.88-7.93 (4H, m), 8.75 (4H, d,  $J = 6.5$  Hz), 9.35 (4H, d,  $J = 6.5$  Hz).  $^{13}\text{C}$  NMR (126 MHz, DMSO- $d_6$ ,  $\delta$ ): 13.75, 21.89, 25.33, 28.22, 28.32, 30.61, 31.00, 50.26, 60.91, 102.67, 117.68, 117.79, 121.43, 126.46, 129.94, 137.78, 145.59, 148.49, 158.04.

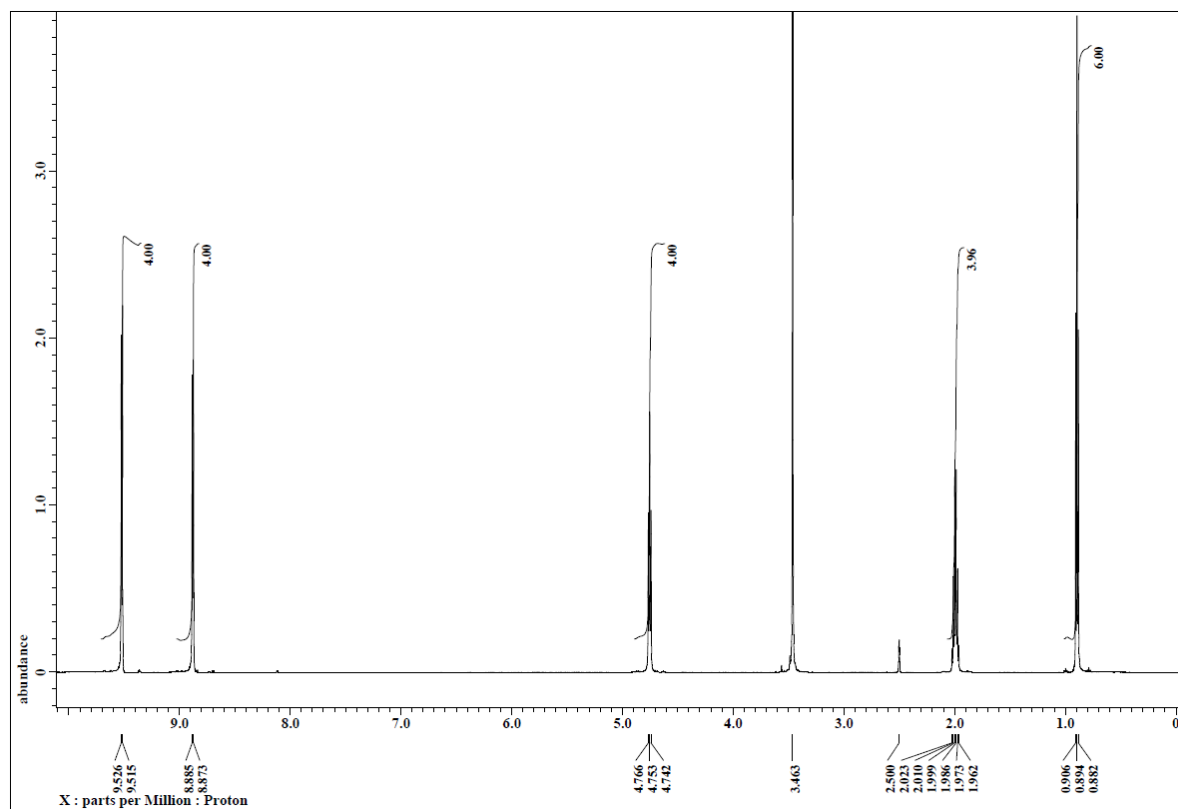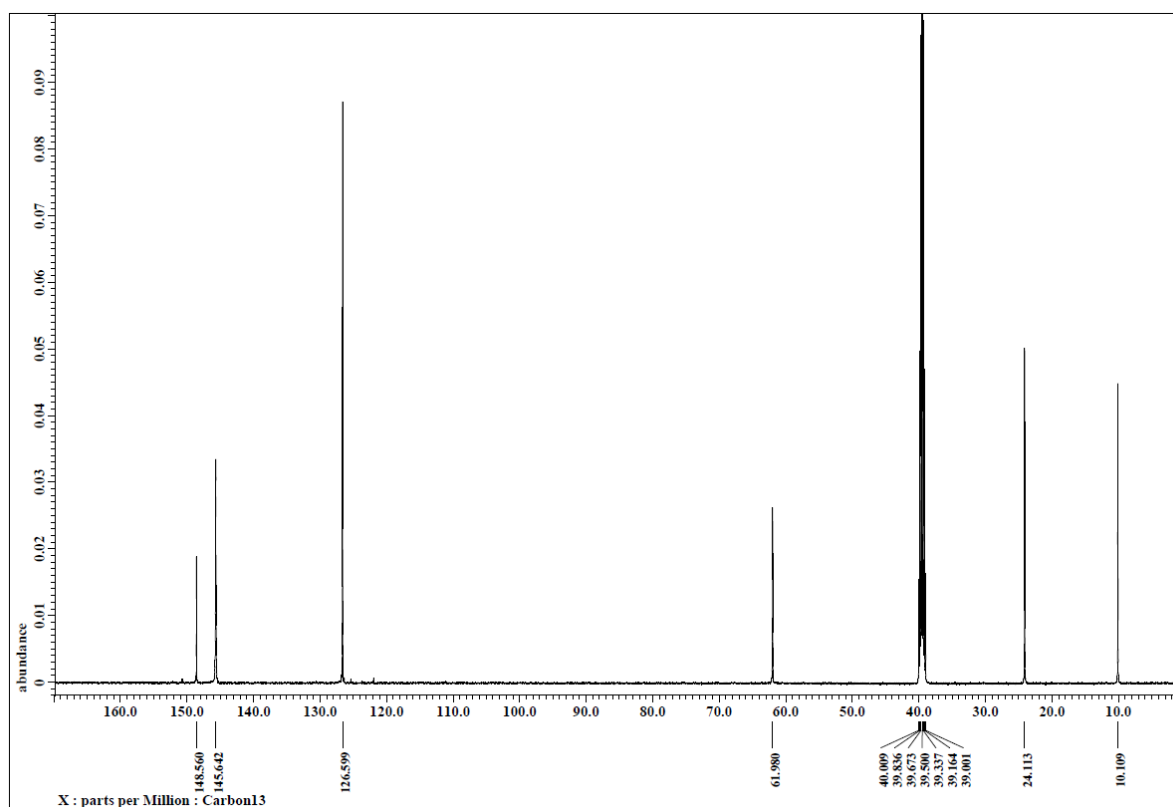

**Fig. S1**  $^1\text{H}$  (top) and  $^{13}\text{C}$  NMR (bottom) spectra of  $\text{C3}^{2+}\text{-2Br}^-$  in  $\text{DMSO-}d_6$ .

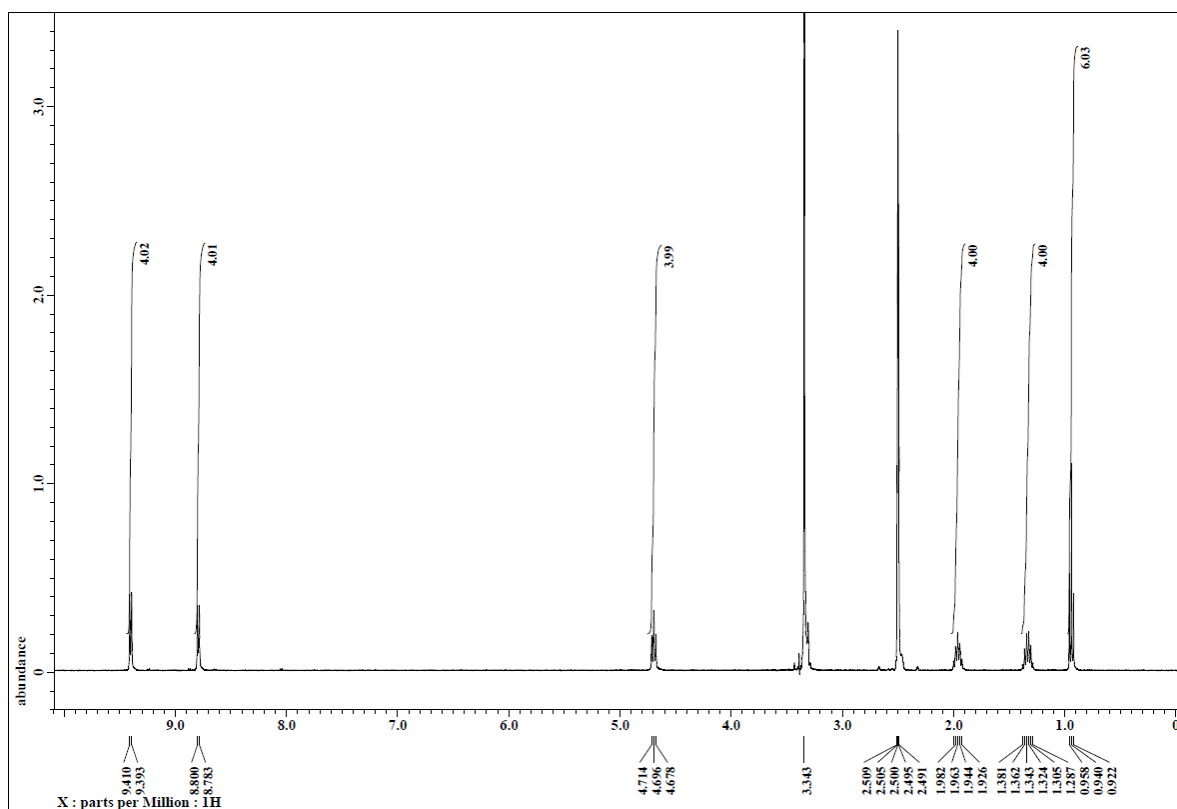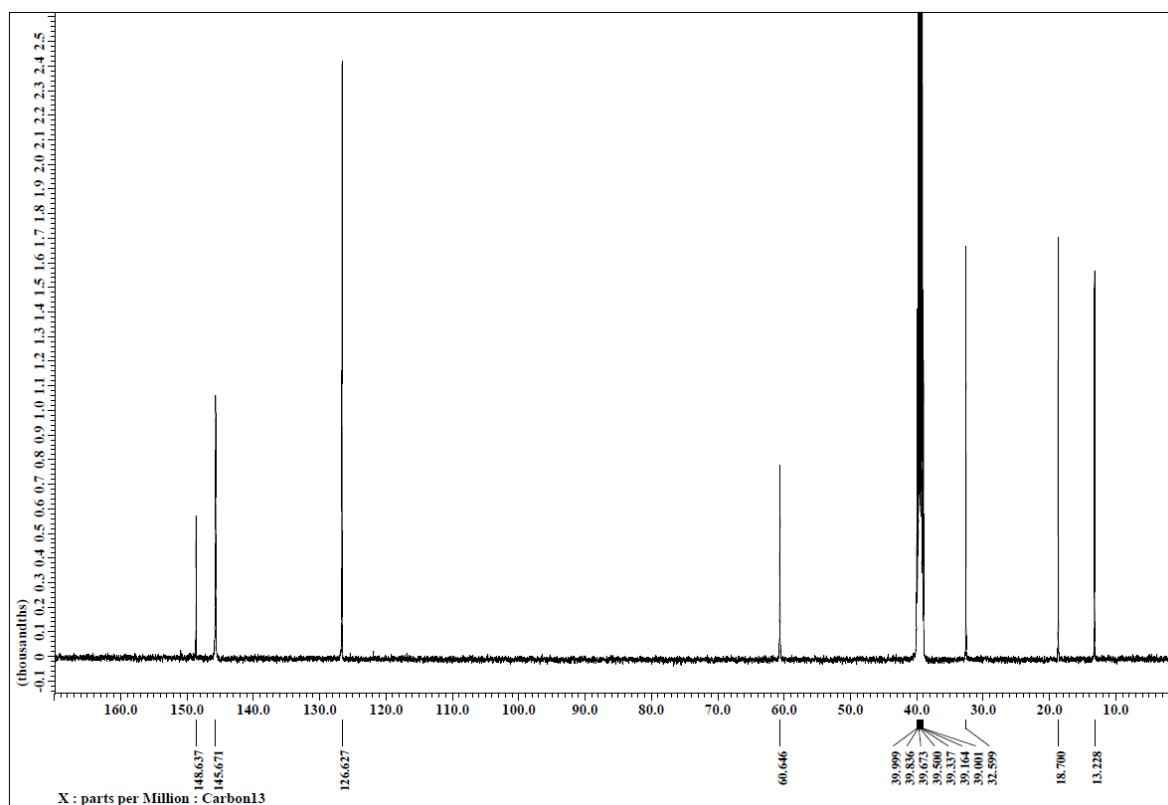

Fig. S2 <sup>1</sup>H (top) and <sup>13</sup>C NMR (bottom) spectra of C4<sup>2+</sup>-2Br<sup>-</sup> in DMSO-d<sub>6</sub>.

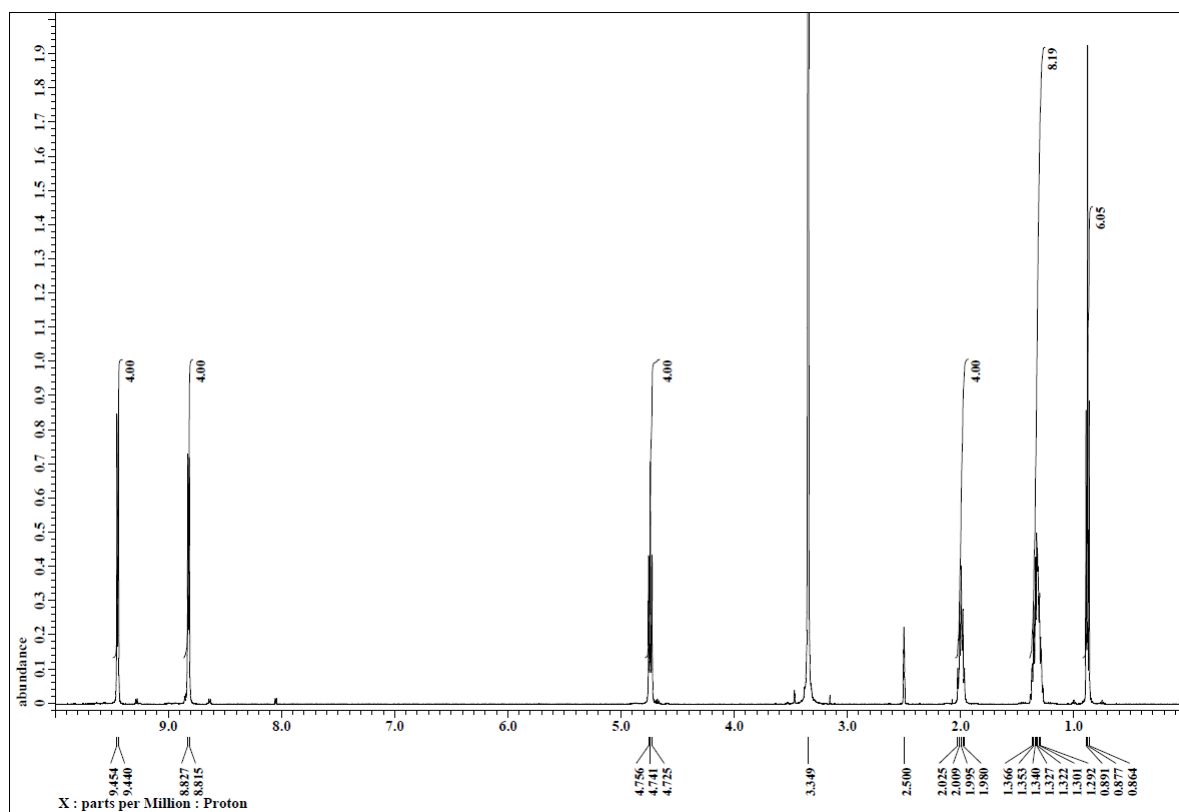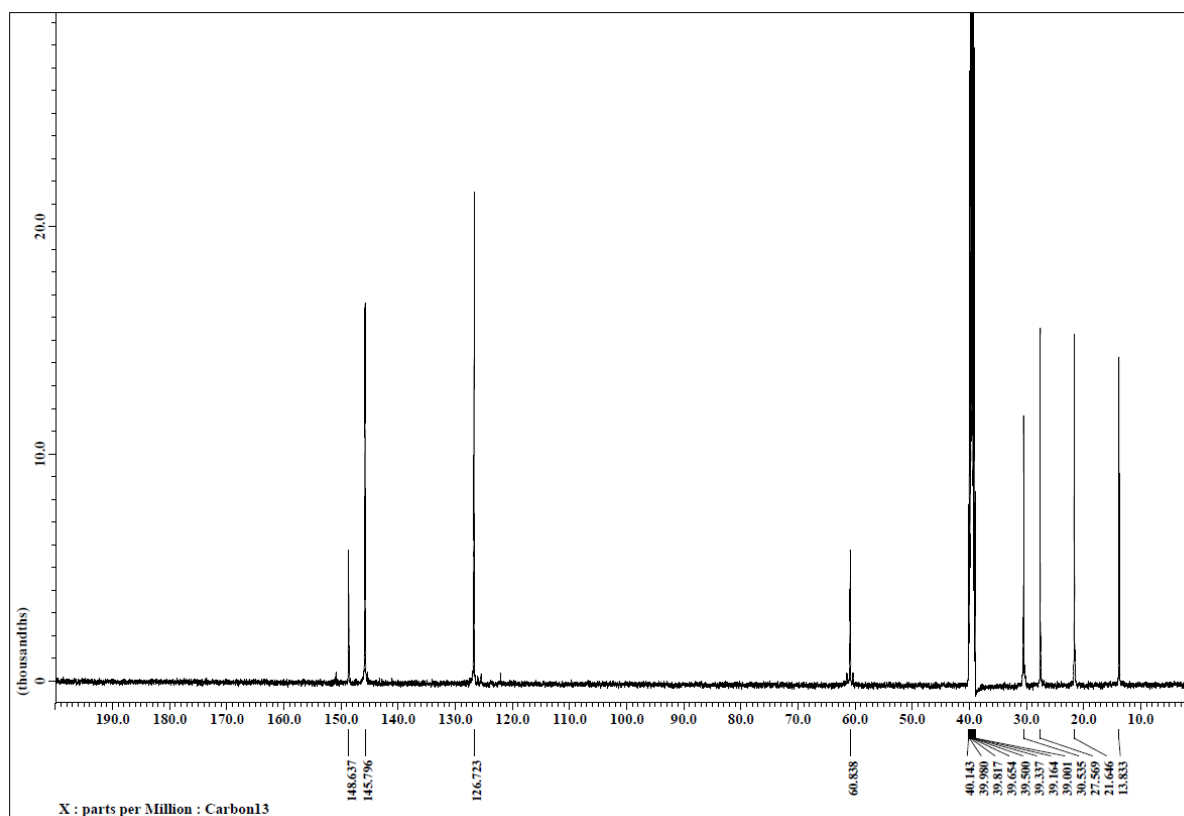

Fig. S3  $^1H$  (top) and  $^{13}C$  NMR (bottom) spectra of  $C5^{2+} \cdot 2Br^-$  in  $DMSO-d_6$ .

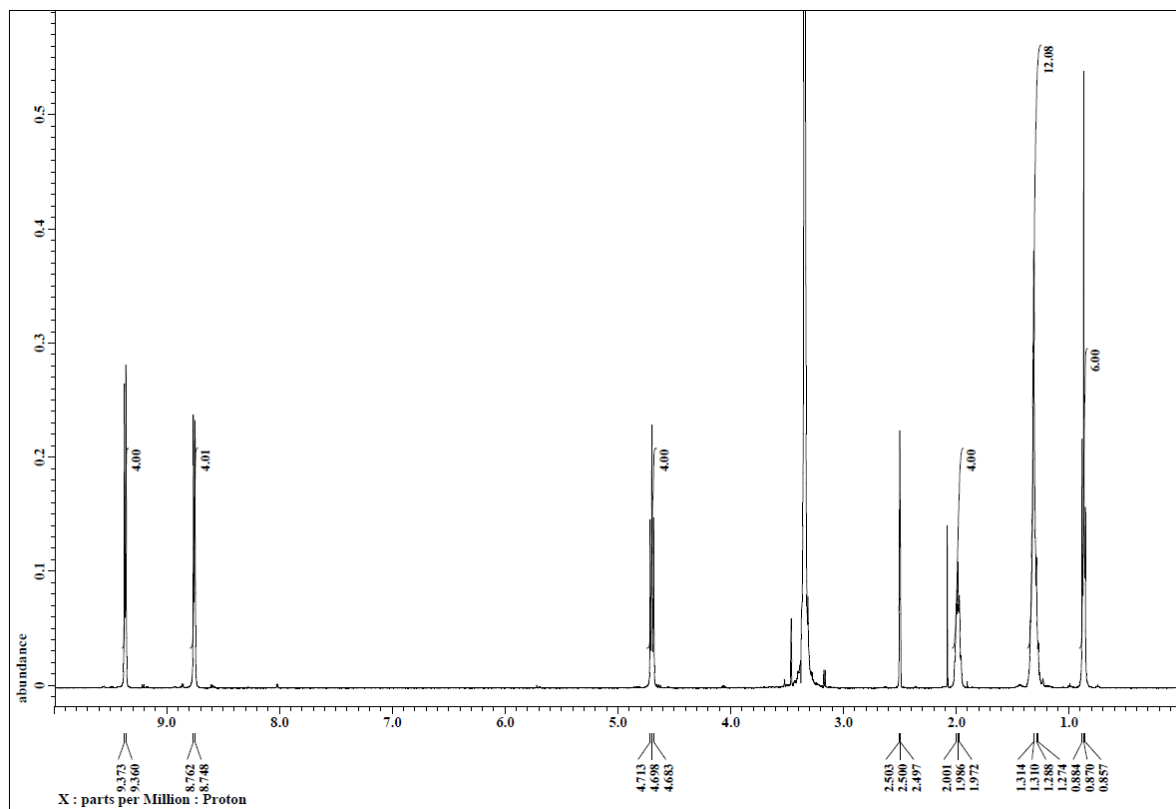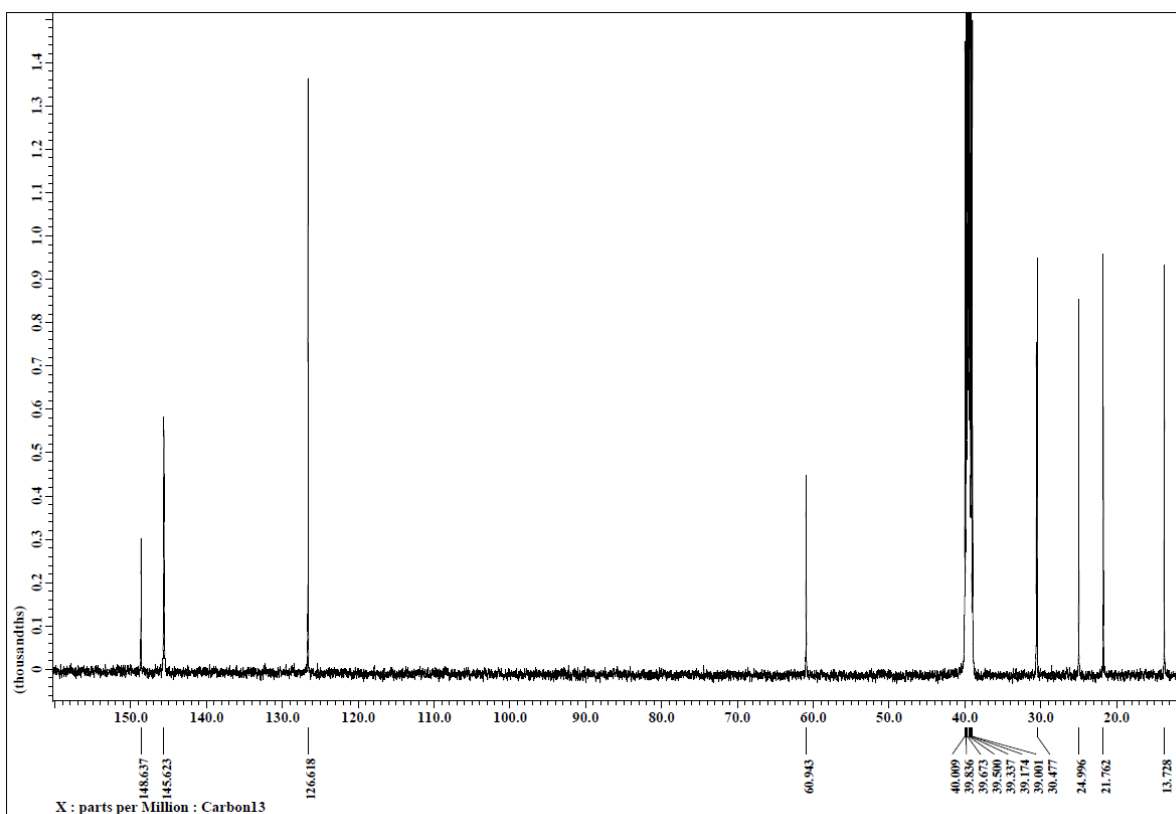

Fig. S4 <sup>1</sup>H (top) and <sup>13</sup>C NMR (bottom) spectra of C6<sup>2+</sup>-2I in DMSO-d<sub>6</sub>.

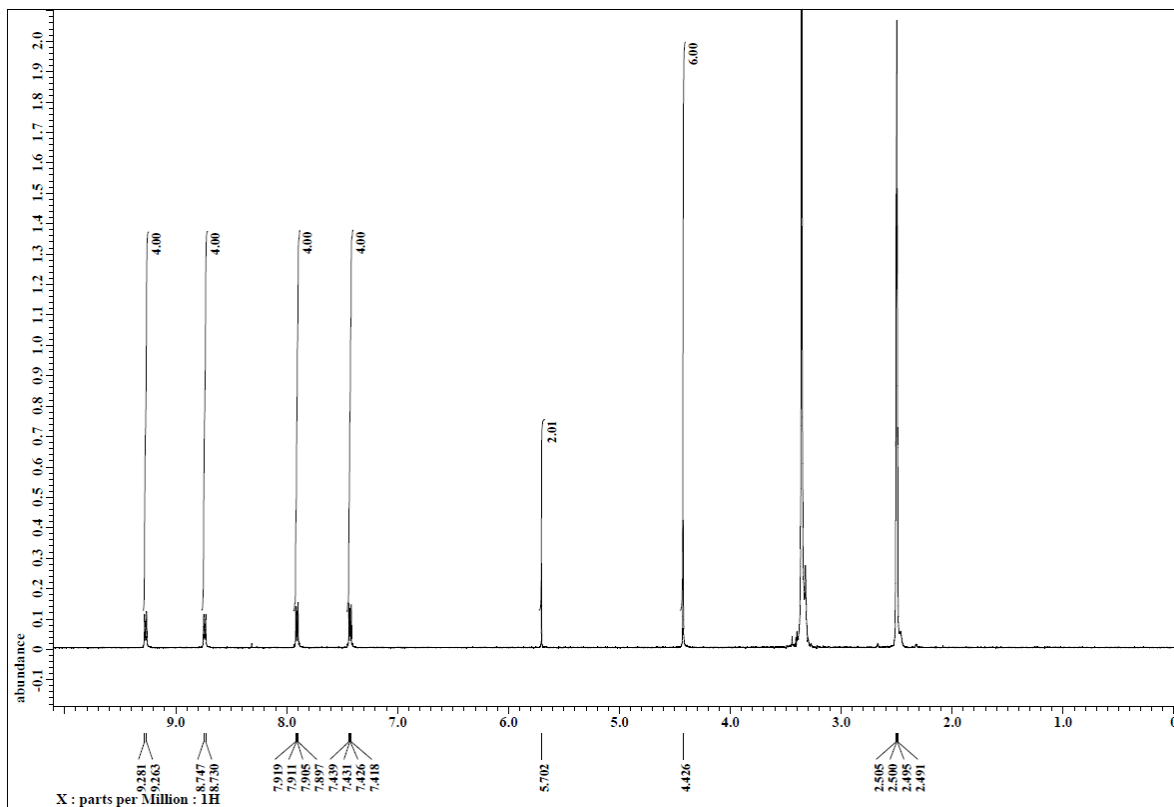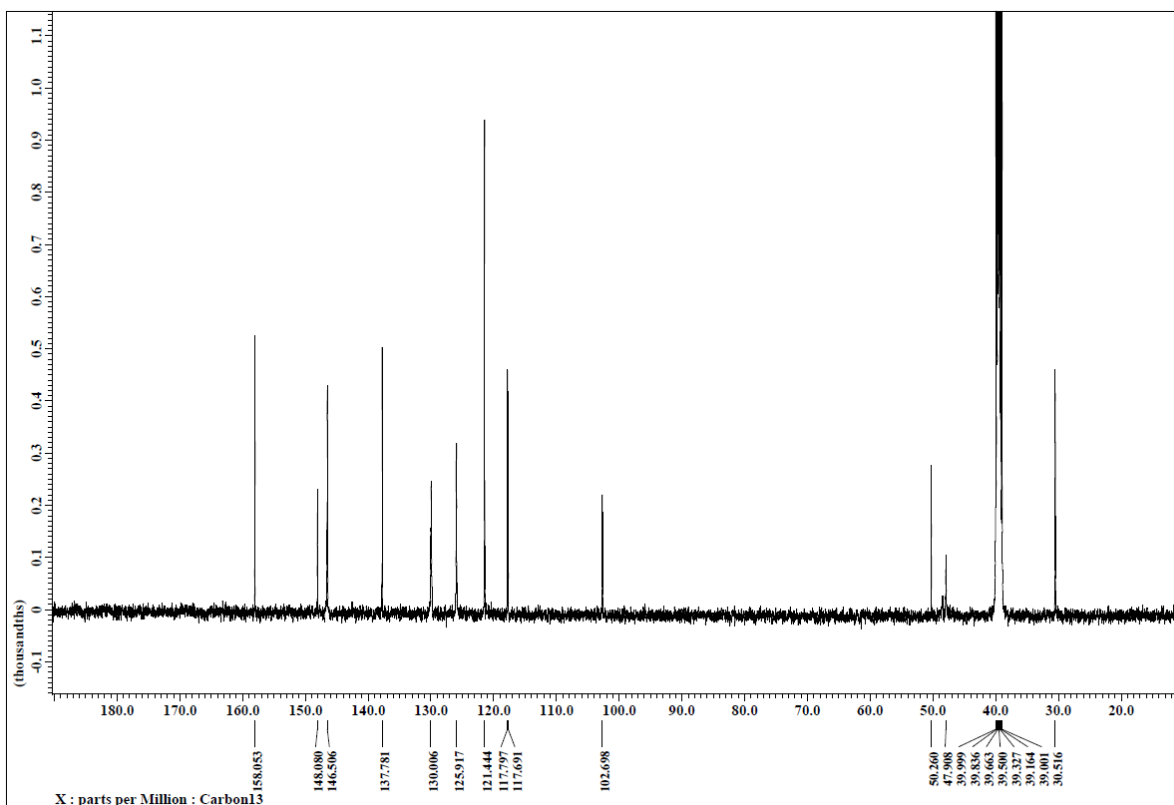

Fig. S5  $^1\text{H}$  (top) and  $^{13}\text{C}$  NMR (bottom) spectra of  $\text{C1}^{2+}\text{-2CMI}^-$  in  $\text{DMSO-}d_6$ .



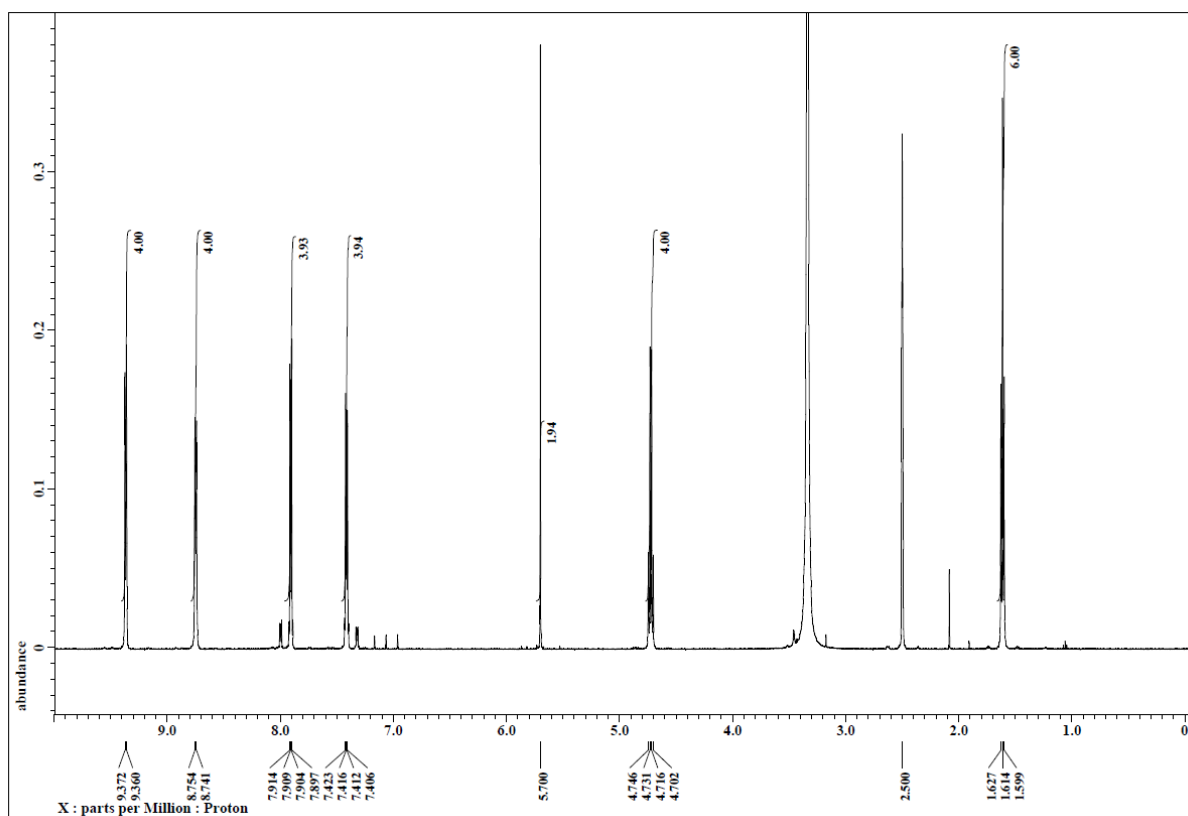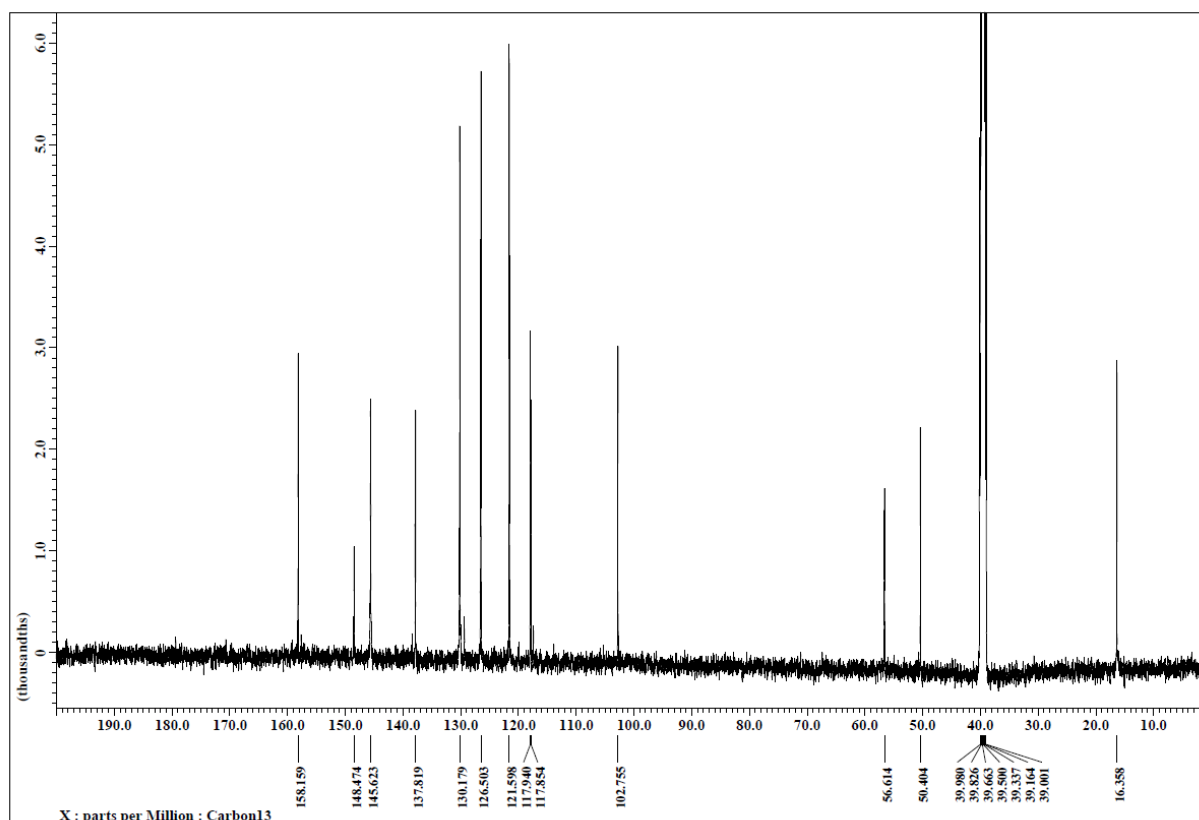

Fig. S6 <sup>1</sup>H (top) and <sup>13</sup>C NMR (bottom) spectra of C2<sup>2+</sup>-2CMF<sup>-</sup> in DMSO-*d*<sub>6</sub>.

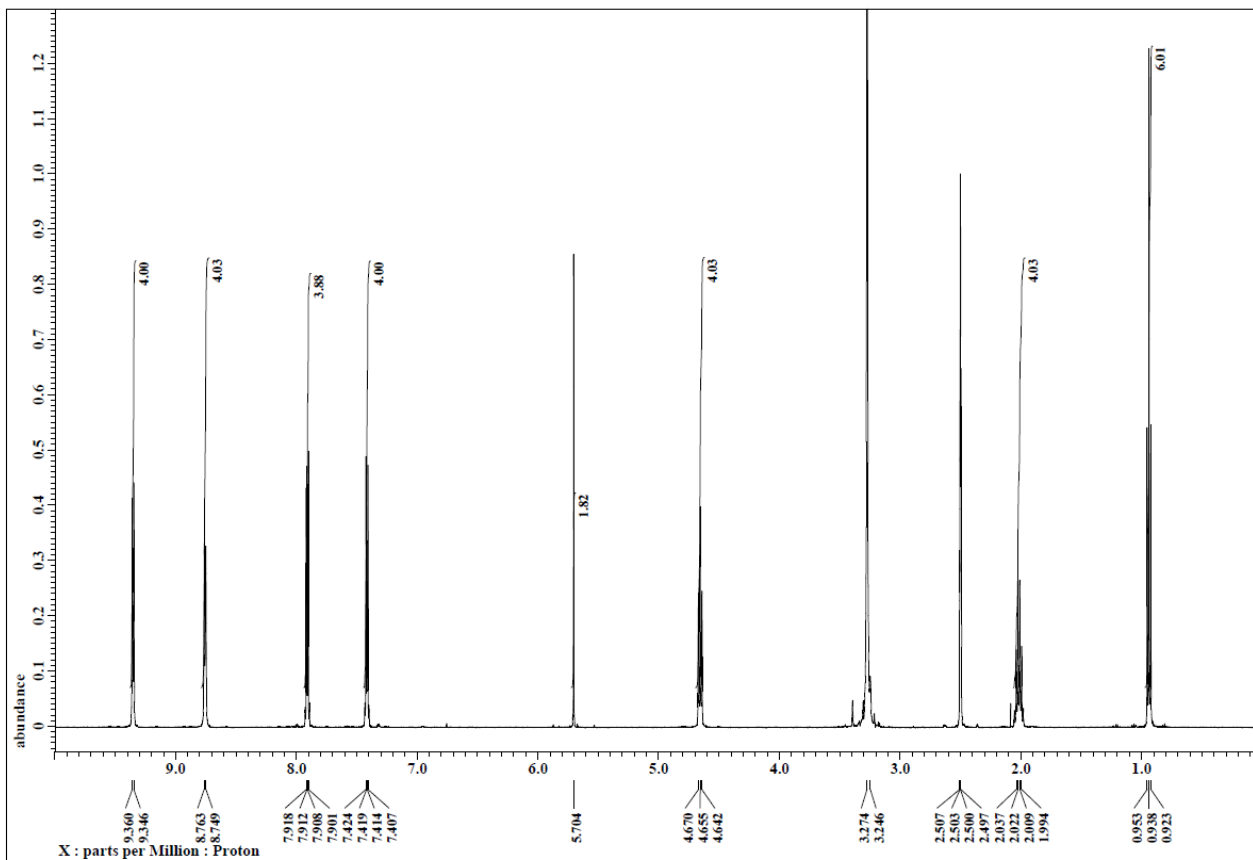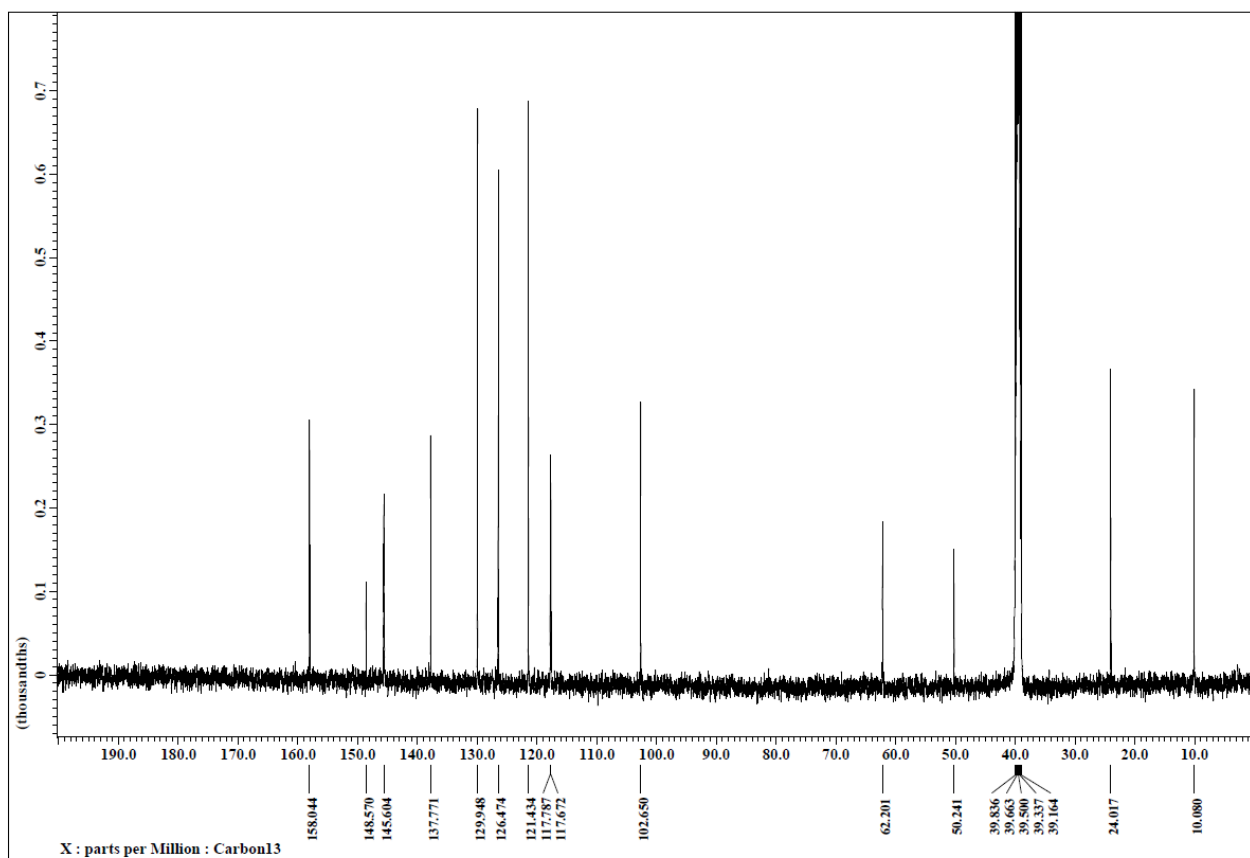

Fig. S7  $^1\text{H}$  (top) and  $^{13}\text{C}$  NMR (bottom) spectra of  $\text{C3}^{2+}\text{-2CMI}^-$  in  $\text{DMSO-}d_6$ .

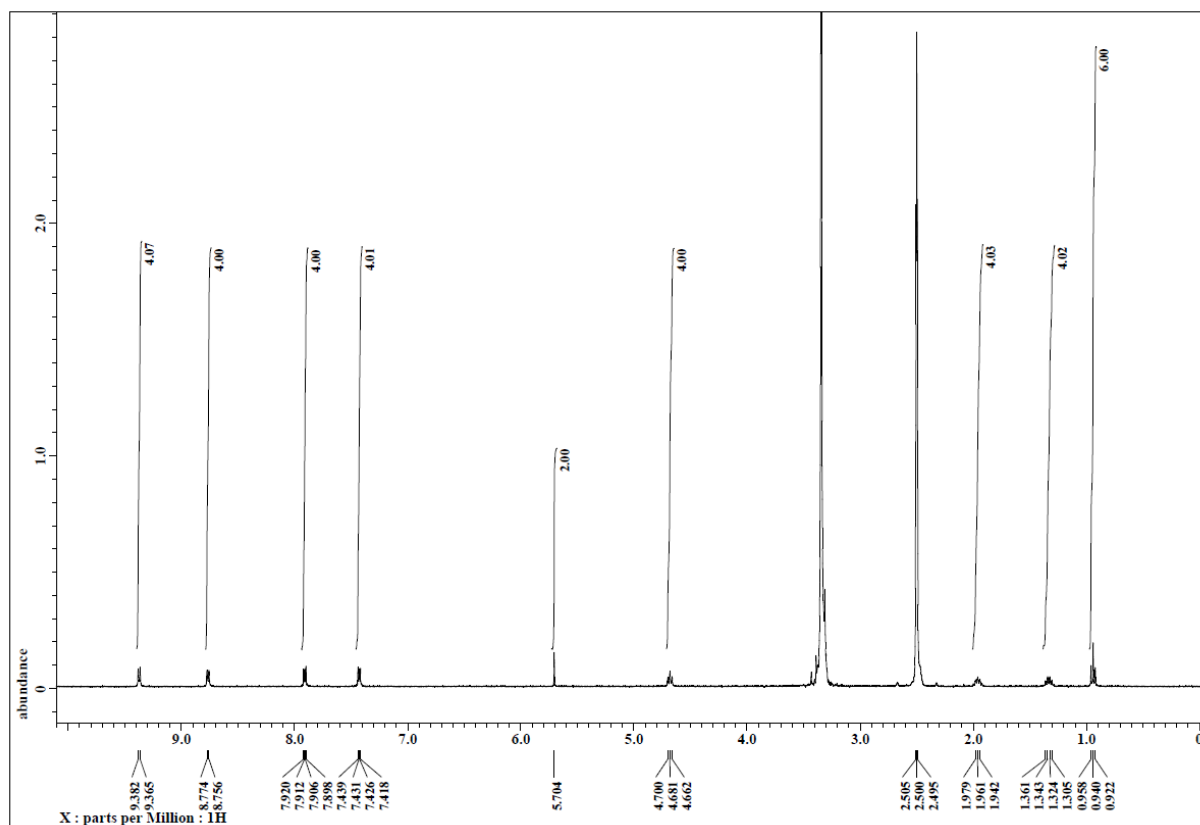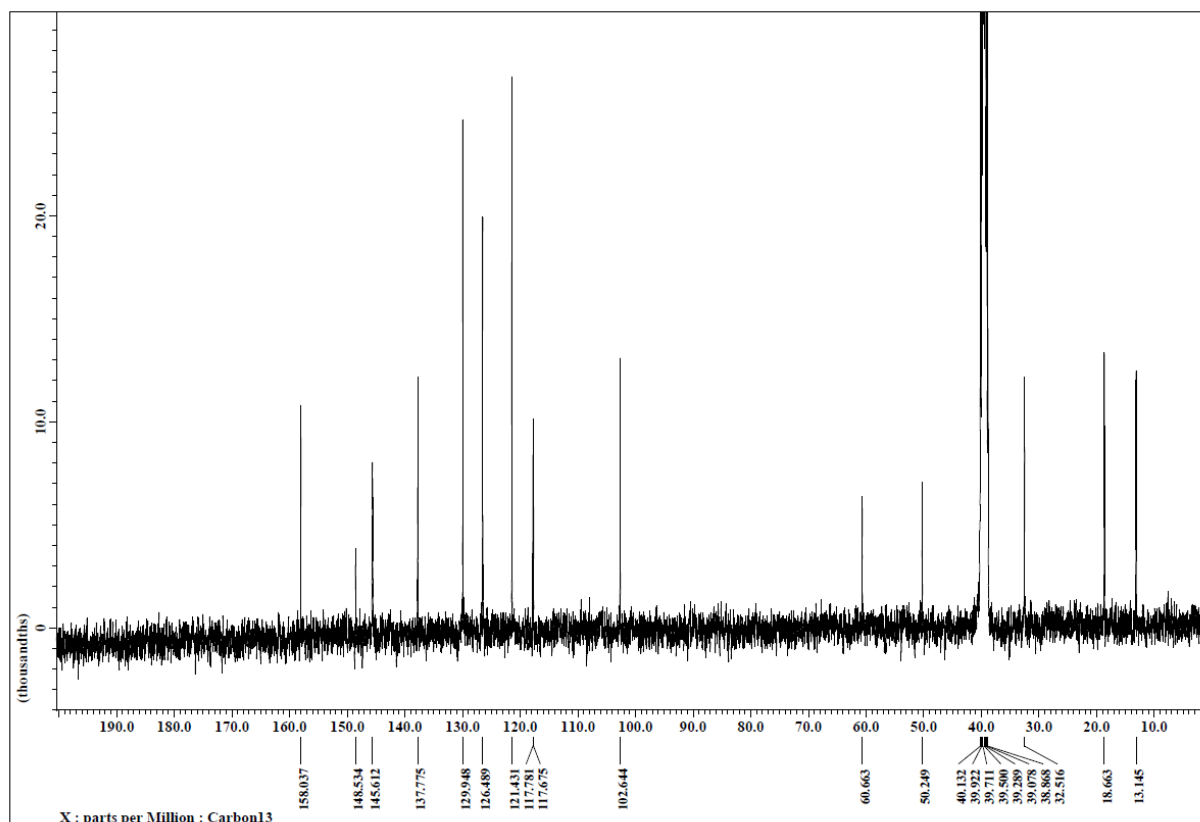

Fig. S8 <sup>1</sup>H (top) and <sup>13</sup>C NMR (bottom) spectra of C4<sup>2+</sup>-2CMI<sup>-</sup> in DMSO-*d*<sub>6</sub>.

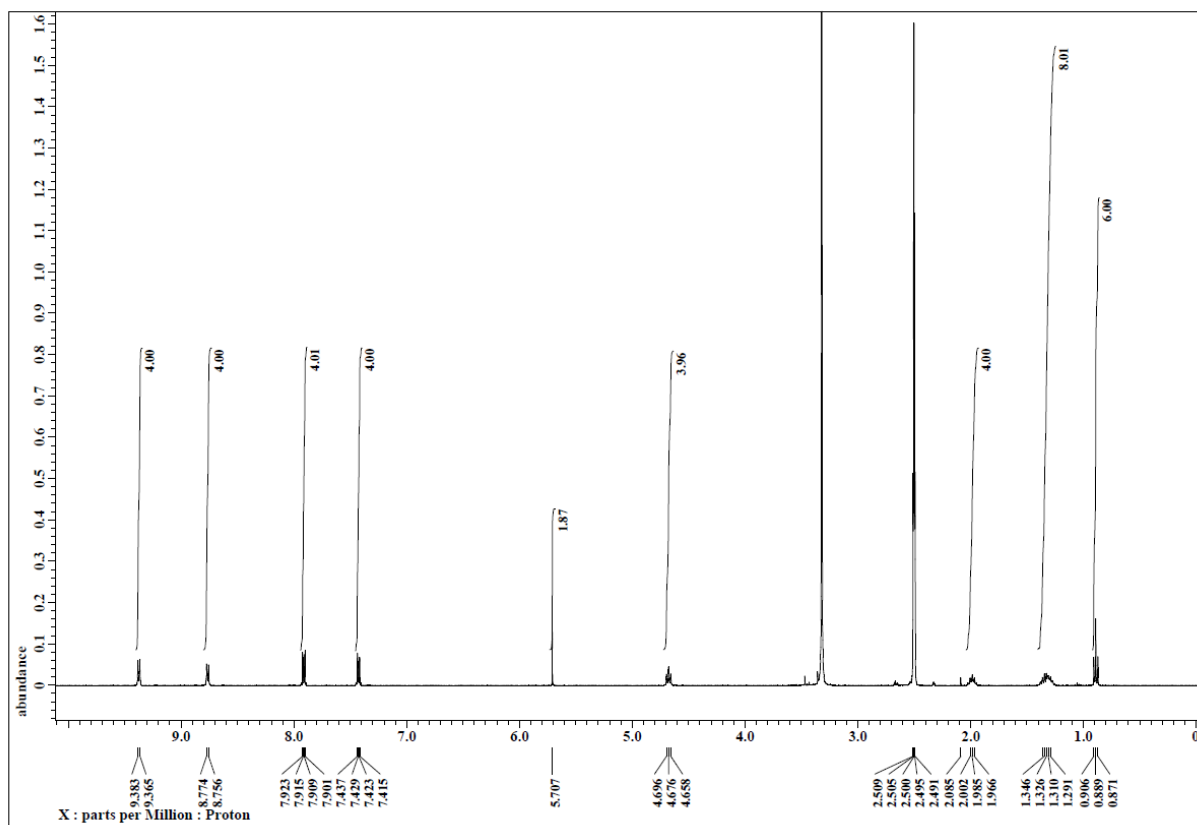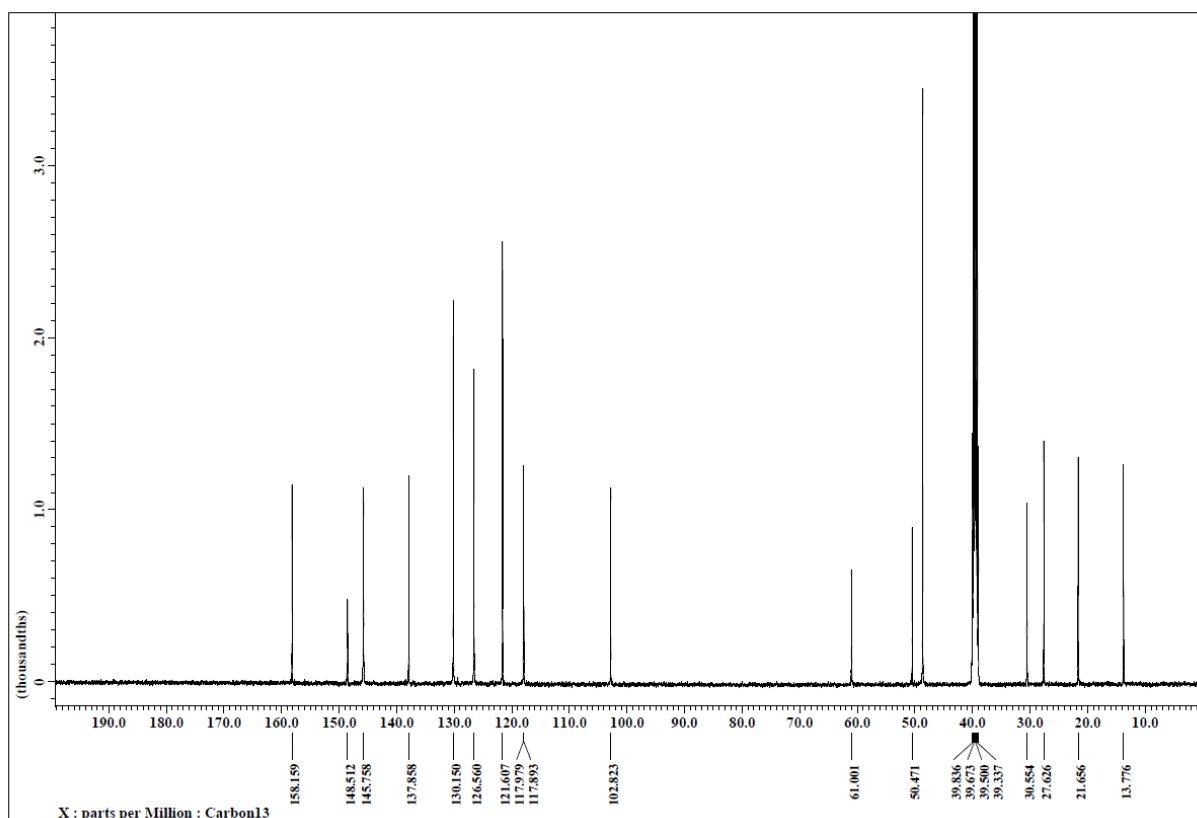

Fig. S9 <sup>1</sup>H (top) and <sup>13</sup>C NMR (bottom) spectra of C5<sup>2+</sup>-2CMI<sup>-</sup> in DMSO-*d*<sub>6</sub>.

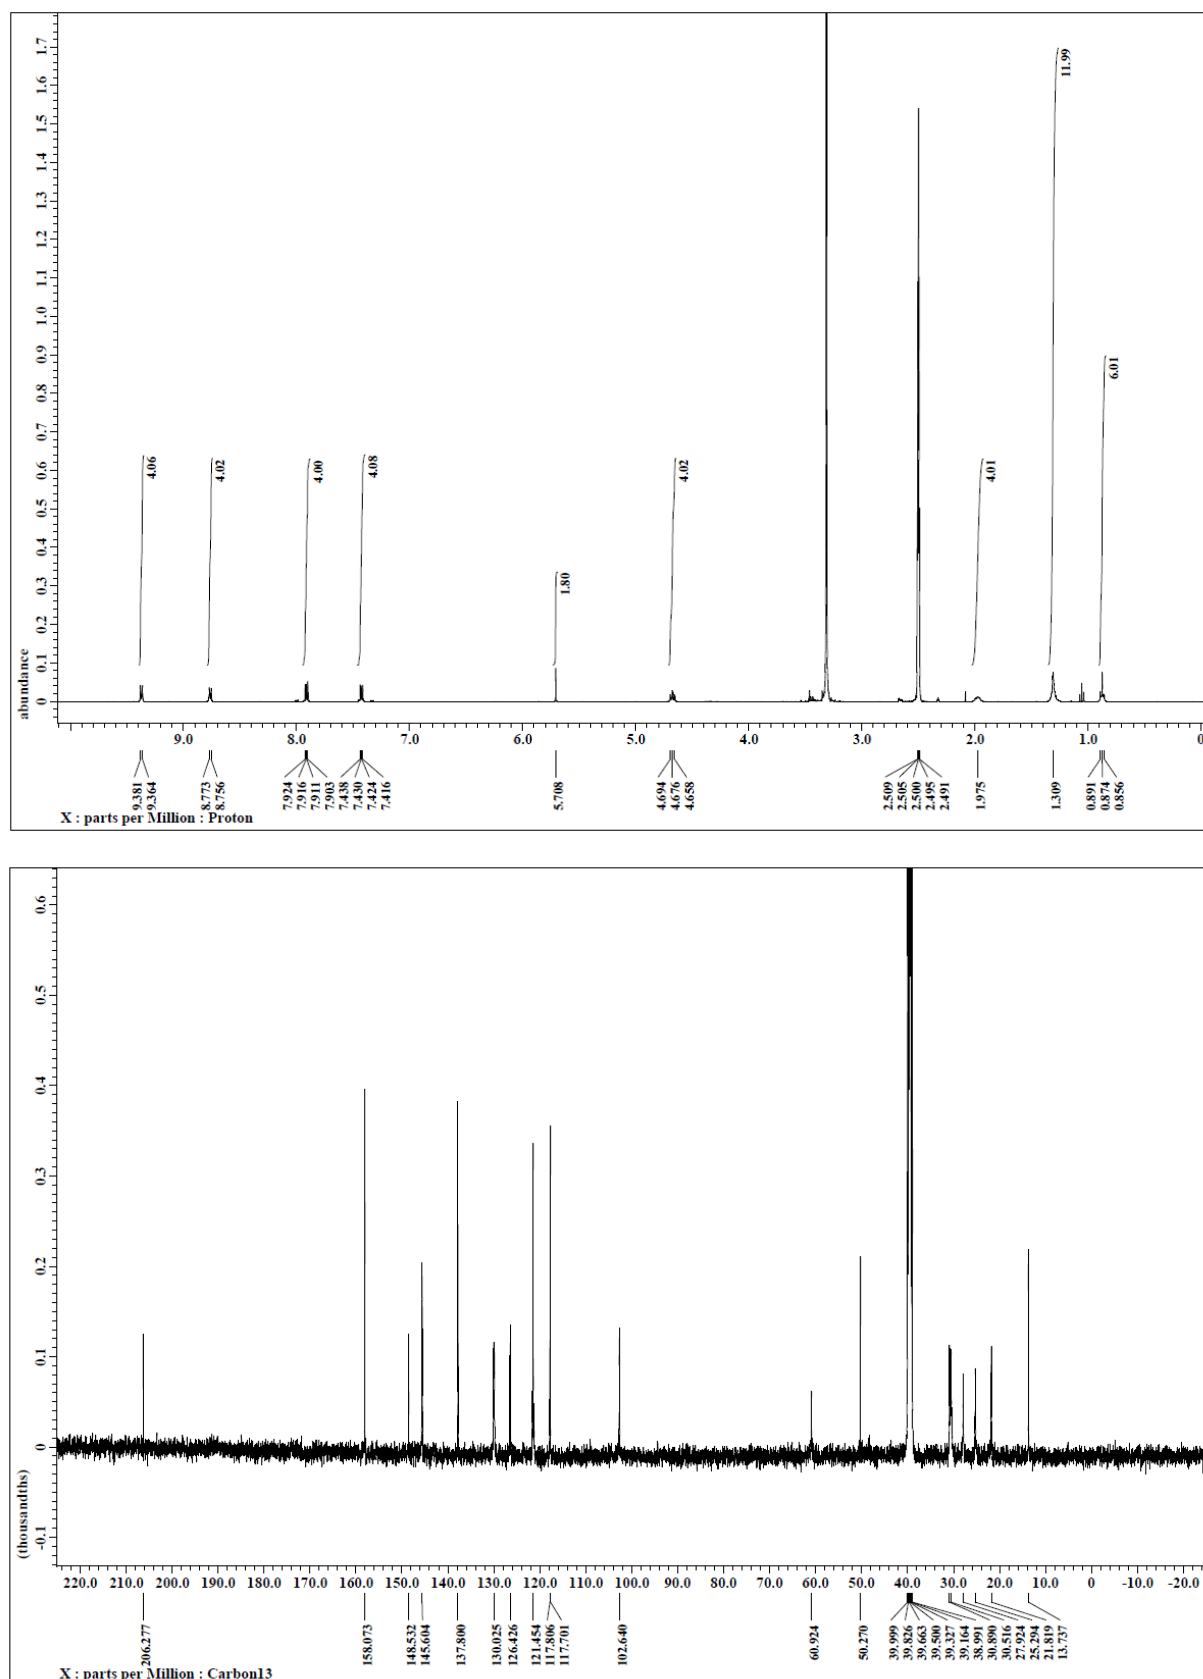

Fig. S10  $^1\text{H}$  (top) and  $^{13}\text{C}$  NMR (bottom) spectra of  $\text{C6}^{2+}\text{-2CMF}^-$  in  $\text{DMSO-}d_6$ .

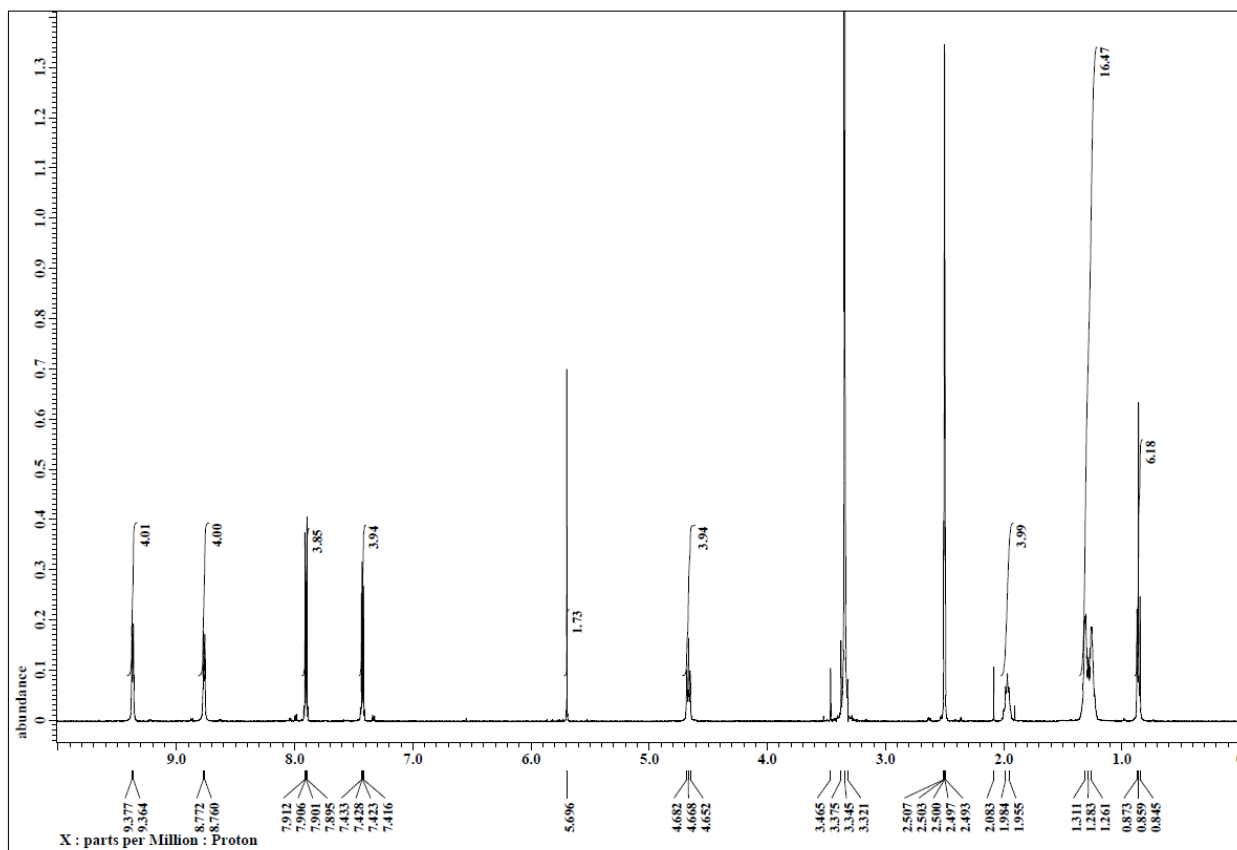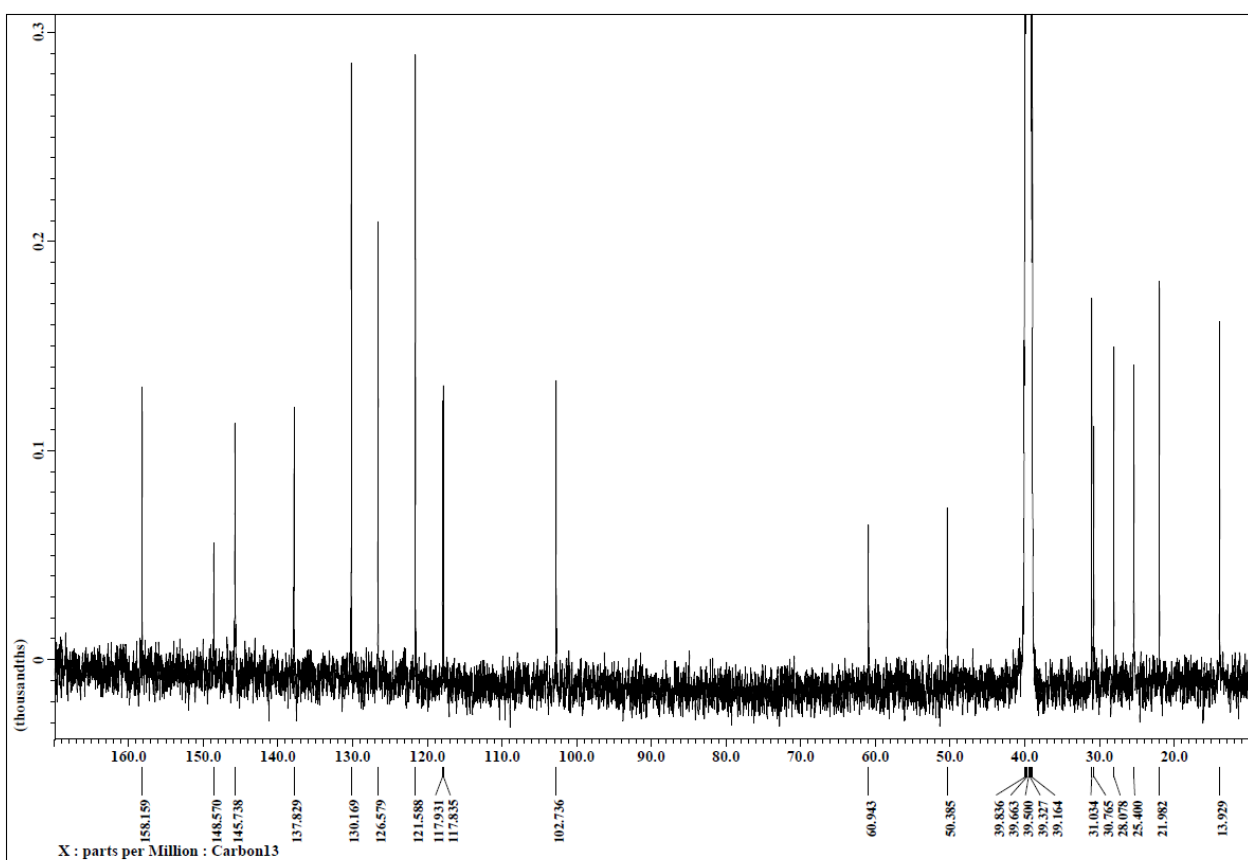

Fig. S11 <sup>1</sup>H (top) and <sup>13</sup>C NMR (bottom) spectra of C7<sup>2+</sup>-2CMI<sup>-</sup> in DMSO-*d*<sub>6</sub>.

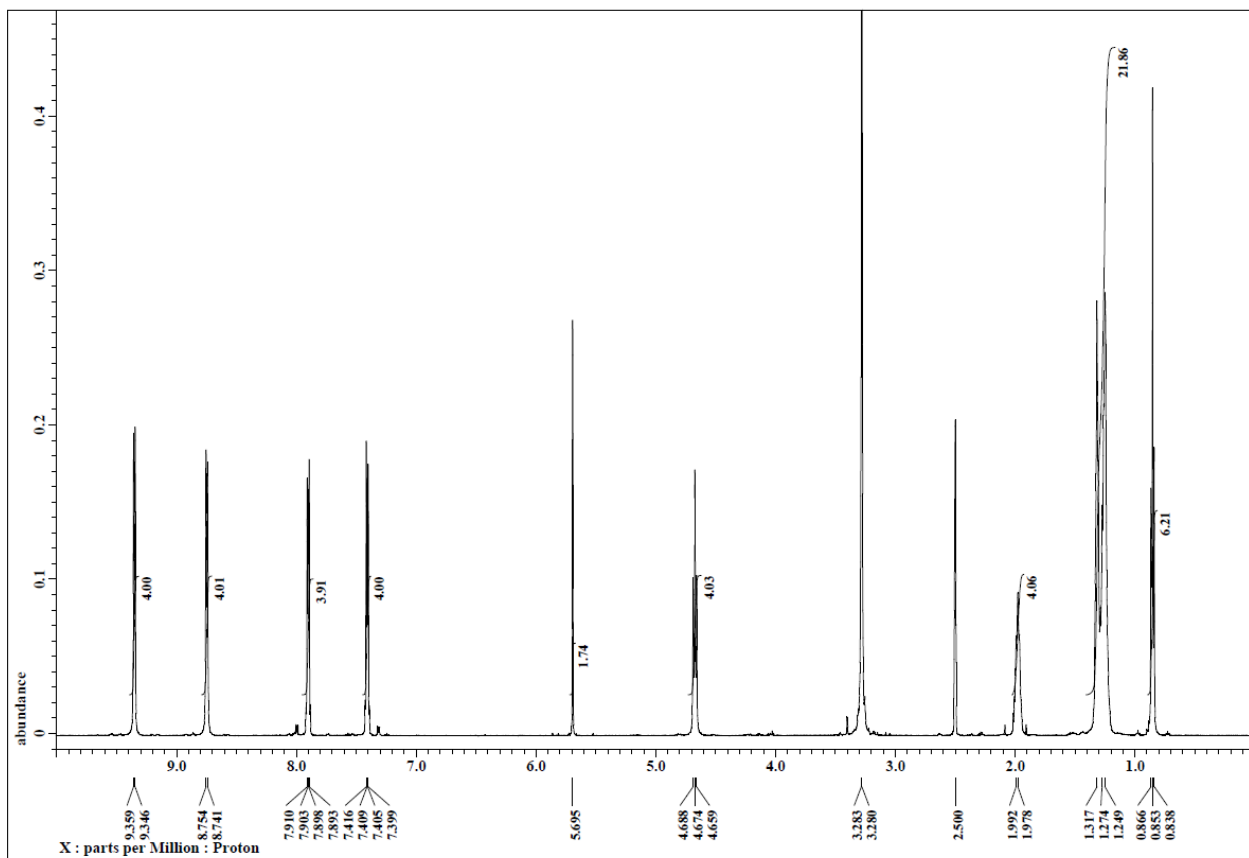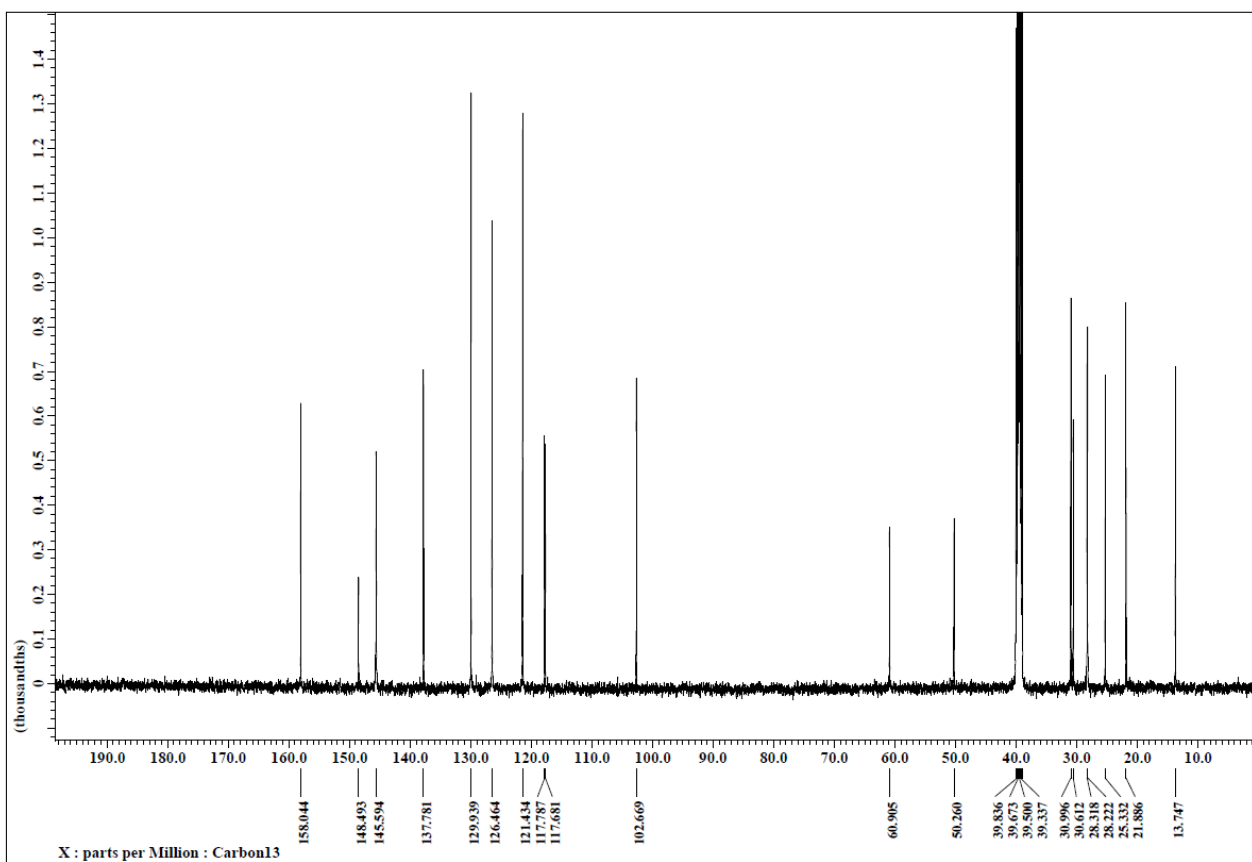

Fig. S12 <sup>1</sup>H (top) and <sup>13</sup>C NMR (bottom) spectra of C8<sup>2+</sup>-2CMI<sup>-</sup> in DMSO-*d*<sub>6</sub>.

## 2. X-ray crystallographic data

*X-ray Crystallography.* Crystallographic data for the ion pairs of  $C1^{2+}-2CMI^{-}$ ,  $C2^{2+}-2CMI^{-}$ ,  $C3^{2+}-2CMI^{-}$ ,  $C4^{2+}-2CMI^{-}$ ,  $C5^{2+}-2CMI^{-}$ , and  $C6^{2+}-2CMI^{-}$  are summarized in Table 1. Single crystals of  $C1^{2+}-2CMI^{-}$  and  $C2^{2+}-2CMI^{-}$  were obtained by the slow evaporation of ethanol solutions. Single crystals of  $C3^{2+}-2CMI^{-}$ ,  $C4^{2+}-2CMI^{-}$ ,  $C5^{2+}-2CMI^{-}$  and  $C6^{2+}-2CMI^{-}$  were obtained by the vapor diffusion of toluene into the acetone solutions. A single crystal of  $C8^{2+}-2CMI^{-}$  was obtained by the vapor diffusion of ethyl acetate into the iso-propanol with small quantity of acetone solution. The data for  $C1^{2+}-2CMI^{-}$ ,  $C2^{2+}-2CMI^{-}$ ,  $C3^{2+}-2CMI^{-}$ ,  $C4^{2+}-2CMI^{-}$ ,  $C5^{2+}-2CMI^{-}$ , and  $C6^{2+}-2CMI^{-}$  were collected at range of 93 to 150 K on a Rigaku Saturn 724 diffuse reflectance spectra with graphite monochromate Mo-K $\alpha$  radiation ( $\lambda = 0.71073 \text{ \AA}$ ). The data for  $C8^{2+}-2CMI^{-}$  was collected at 90 K on DECTRIS EIGAR monochromated synchrotron radiation ( $\lambda = 0.811069 \text{ \AA}$ ) at BL02B1 (Spring-8). The non-hydrogen atoms were refined anisotropically. In this paper, the  $\pi$ -plane distances out of parallel orientations have been defined as the average lengths between non-hydrogen atoms of  $\pi$  units and the mean planes of their neighboring  $\pi$  units. The CIF files (CCDC-2268733-2268739) can be obtained free of charge from the Cambridge Crystallographic Data Centre via [www.ccdc.cam.ac.uk/data\\_request/cif](http://www.ccdc.cam.ac.uk/data_request/cif).



**Table S1** Crystallographic details for **C1<sup>2+</sup>-2CMI<sup>-</sup>**, **C2<sup>2+</sup>-2CMI<sup>-</sup>**, **C3<sup>2+</sup>-2CMI<sup>-</sup>**, **C4<sup>2+</sup>-2CMI<sup>-</sup>**, **C5<sup>2+</sup>-2CMI<sup>-</sup>**, **C6<sup>2+</sup>-2CMI<sup>-</sup>**, and **C8<sup>2+</sup>-2CMI<sup>-</sup>**.

|                                                              | <b>C1<sup>2+</sup>-2CMI<sup>-</sup></b>         | <b>C2<sup>2+</sup>-2CMI<sup>-</sup></b>         | <b>C3<sup>2+</sup>-2CMI<sup>-</sup></b>           | <b>C4<sup>2+</sup>-2CMI<sup>-</sup></b>         |
|--------------------------------------------------------------|-------------------------------------------------|-------------------------------------------------|---------------------------------------------------|-------------------------------------------------|
| Formula                                                      | C <sub>42</sub> H <sub>24</sub> N <sub>10</sub> | C <sub>44</sub> H <sub>28</sub> N <sub>10</sub> | C <sub>46</sub> H <sub>32</sub> N <sub>10</sub>   | C <sub>48</sub> H <sub>36</sub> N <sub>10</sub> |
| fw                                                           | 334.36                                          | 348.38                                          | 724.81                                            | 752.87                                          |
| crystal size, mm                                             | 0.130 × 0.130 × 0.080                           | 0.200 × 0.150 × 0.100                           | 0.130 × 0.120 × 0.030                             | 0.200 × 0.100 × 0.040                           |
| crystal system                                               | Monoclinic                                      | Triclinic                                       | Triclinic                                         | Monoclinic                                      |
| space group                                                  | <i>C2/c</i> (no. 15)                            | <i>P</i> -1 (no. 2)                             | <i>P</i> -1 (no. 2)                               | <i>P2<sub>1</sub>/c</i> (no. 13)                |
| <i>a</i> , Å                                                 | 16.3110(4)                                      | 8.1502(3)                                       | 8.6480(3)                                         | 10.8550(2)                                      |
| <i>b</i> , Å                                                 | 19.5847(4)                                      | 10.8528(3)                                      | 11.3059(4)                                        | 18.6894(3)                                      |
| <i>c</i> , Å                                                 | 11.1122(3)                                      | 10.8895(3)                                      | 21.0344(7)                                        | 10.1304(2)                                      |
| $\alpha$ , °                                                 | 90                                              | 73.506(2)                                       | 74.729(3)                                         | 90                                              |
| $\beta$ , °                                                  | 108.012(3)                                      | 71.656(3)                                       | 82.132(3)                                         | 107.219(2)                                      |
| $\gamma$ , °                                                 | 90                                              | 89.385(2)                                       | 70.001(3)                                         | 90                                              |
| <i>V</i> , Å <sup>3</sup>                                    | 3375.78(15)                                     | 873.35(5)                                       | 1861.86(12)                                       | 1963.08(6)                                      |
| $\rho_{\text{calcd}}$ , gcm <sup>-3</sup>                    | 1.316                                           | 1.325                                           | 1.293                                             | 1.274                                           |
| <i>Z</i>                                                     | 8                                               | 2                                               | 2                                                 | 2                                               |
| <i>T</i> , K                                                 | 93                                              | 93                                              | 150                                               | 150                                             |
| $\mu$ , mm <sup>-1</sup>                                     | 0.082 (Mo-K $\alpha$ )                          | 0.082 (Mo-K $\alpha$ )                          | 0.080 (Mo-K $\alpha$ )                            | 0.078 (Mo-K $\alpha$ )                          |
| no. of reflns                                                | 27672                                           | 11949                                           | 21752                                             | 25997                                           |
| no. of unique reflns                                         | 3873                                            | 3969                                            | 6796                                              | 4450                                            |
| variables                                                    | 241                                             | 247                                             | 510                                               | 266                                             |
| $\lambda$ , Å                                                | 0.71073 (Mo-K $\alpha$ )                        | 0.71073 (Mo-K $\alpha$ )                        | 0.71073 (Mo-K $\alpha$ )                          | 0.71073 (Mo-K $\alpha$ )                        |
| <i>R</i> <sub>1</sub> ( <i>I</i> > 2 $\sigma$ ( <i>I</i> ))  | 0.0401                                          | 0.0426                                          | 0.0791                                            | 0.0460                                          |
| <i>wR</i> <sub>2</sub> ( <i>I</i> > 2 $\sigma$ ( <i>I</i> )) | 0.1058                                          | 0.1073                                          | 0.1766                                            | 0.1280                                          |
| <i>GOF</i>                                                   | 1.043                                           | 1.033                                           | 1.056                                             | 1.088                                           |
|                                                              | <b>C5<sup>2+</sup>-2CMI<sup>-</sup></b>         | <b>C6<sup>2+</sup>-2CMI<sup>-</sup></b>         | <b>C8<sup>2+</sup>-2CMI<sup>-</sup></b>           |                                                 |
| Formula                                                      | C <sub>50</sub> H <sub>40</sub> N <sub>10</sub> | C <sub>52</sub> H <sub>44</sub> N <sub>10</sub> | C <sub>59</sub> H <sub>56</sub> N <sub>10</sub> O |                                                 |
| fw                                                           | 780.92                                          | 808.97                                          | 921.13                                            |                                                 |
| crystal size, mm                                             | 0.160 × 0.140 × 0.040                           | 0.160 × 0.140 × 0.040                           | 0.200 × 0.160 × 0.040                             |                                                 |
| crystal system                                               | Triclinic                                       | Monoclinic                                      | Triclinic                                         |                                                 |
| space group                                                  | <i>P</i> -1 (no. 2)                             | <i>P2<sub>1</sub>/c</i> (no. 13)                | <i>P</i> -1 (no. 2)                               |                                                 |
| <i>a</i> , Å                                                 | 11.2406(2)                                      | 8.25330(10)                                     | 9.5662(2)                                         |                                                 |
| <i>b</i> , Å                                                 | 13.7520(3)                                      | 16.1442(3)                                      | 12.9105(3)                                        |                                                 |
| <i>c</i> , Å                                                 | 14.5481(3)                                      | 17.4065(4)                                      | 13.0276(3)                                        |                                                 |
| $\alpha$ , °                                                 | 68.229(2)                                       | 90                                              | 64.830(2)                                         |                                                 |
| $\beta$ , °                                                  | 75.915(2)                                       | 110.275(2)                                      | 87.544(2)                                         |                                                 |
| $\gamma$ , °                                                 | 85.545(2)                                       | 90                                              | 69.361(2)                                         |                                                 |
| <i>V</i> , Å <sup>3</sup>                                    | 2025.47(8)                                      | 2175.59(7)                                      | 1351.81(6)                                        |                                                 |
| $\rho_{\text{calcd}}$ , gcm <sup>-3</sup>                    | 1.28                                            | 1.235                                           | 1.132                                             |                                                 |
| <i>Z</i>                                                     | 2                                               | 2                                               | 1                                                 |                                                 |
| <i>T</i> , K                                                 | 150                                             | 150                                             | 293                                               |                                                 |
| $\mu$ , mm <sup>-1</sup>                                     | 0.079 (Mo-K $\alpha$ )                          | 0.076 (Mo-K $\alpha$ )                          | 0.070 (synchrotron)                               |                                                 |
| no. of reflns                                                | 28031                                           | 29170                                           | 71607                                             |                                                 |
| no. of unique reflns                                         | 9221                                            | 4952                                            | 13259                                             |                                                 |
| variables                                                    | 549                                             | 284                                             | 338                                               |                                                 |
| $\lambda$ , Å                                                | 0.71073 (Mo-K $\alpha$ )                        | 0.71073 (Mo-K $\alpha$ )                        | 0.81107 (synchrotron)                             |                                                 |
| <i>R</i> <sub>1</sub> ( <i>I</i> > 2 $\sigma$ ( <i>I</i> ))  | 0.0637                                          | 0.0423                                          | 0.0618                                            |                                                 |
| <i>wR</i> <sub>2</sub> ( <i>I</i> > 2 $\sigma$ ( <i>I</i> )) | 0.1632                                          | 0.1108                                          | 0.1903                                            |                                                 |
| <i>GOF</i>                                                   | 1.056                                           | 1.027                                           | 1.038                                             |                                                 |

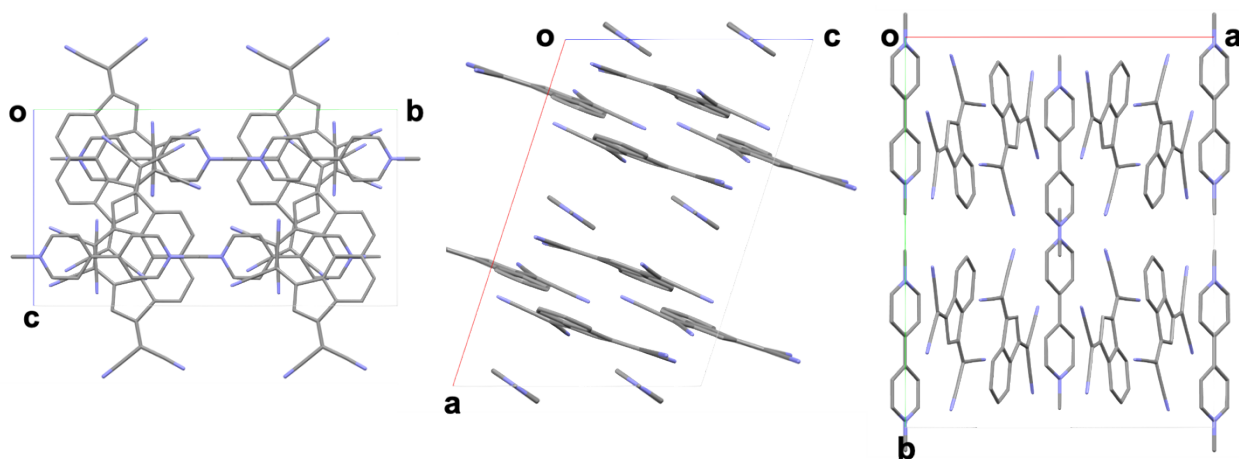

Fig. S13 Packing diagrams (viewed along the  $a$ ,  $b$ , and  $c$  axes) of  $C1^{2+}-2CMI^{-}$ .

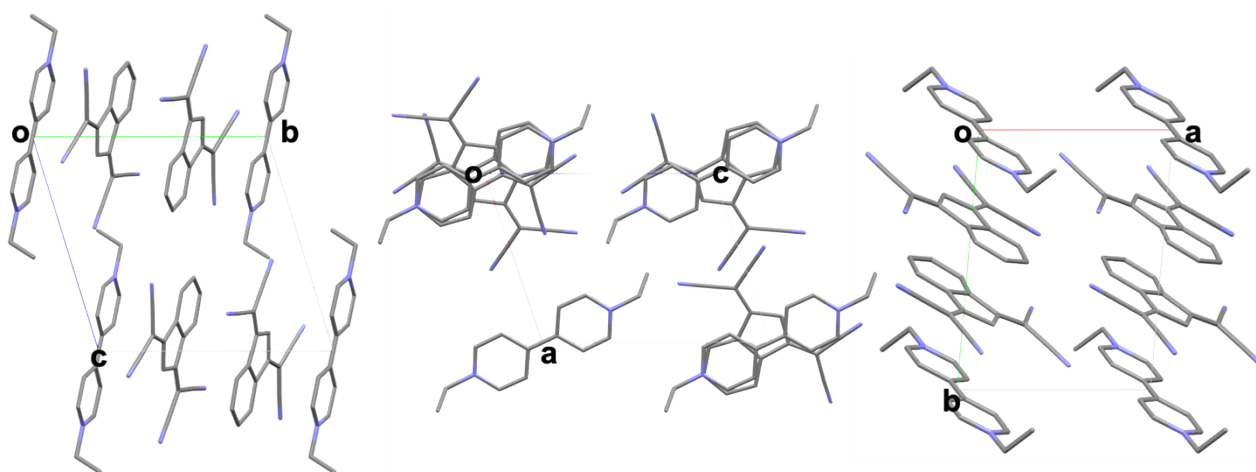

Fig. S14 Packing diagrams (viewed along the  $a$ ,  $b$ , and  $c$  axes) of  $C2^{2+}-2CMI^{-}$ .

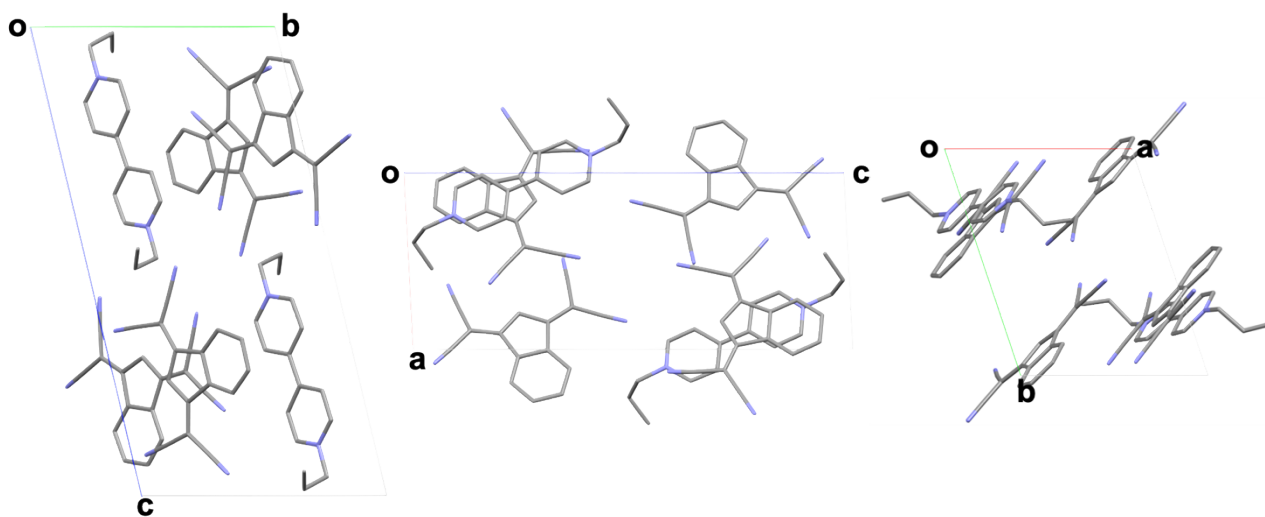

Fig. S15 Packing diagrams (viewed along the  $a$ ,  $b$ , and  $c$  axes) of  $C3^{2+}-2CMI^{-}$ .

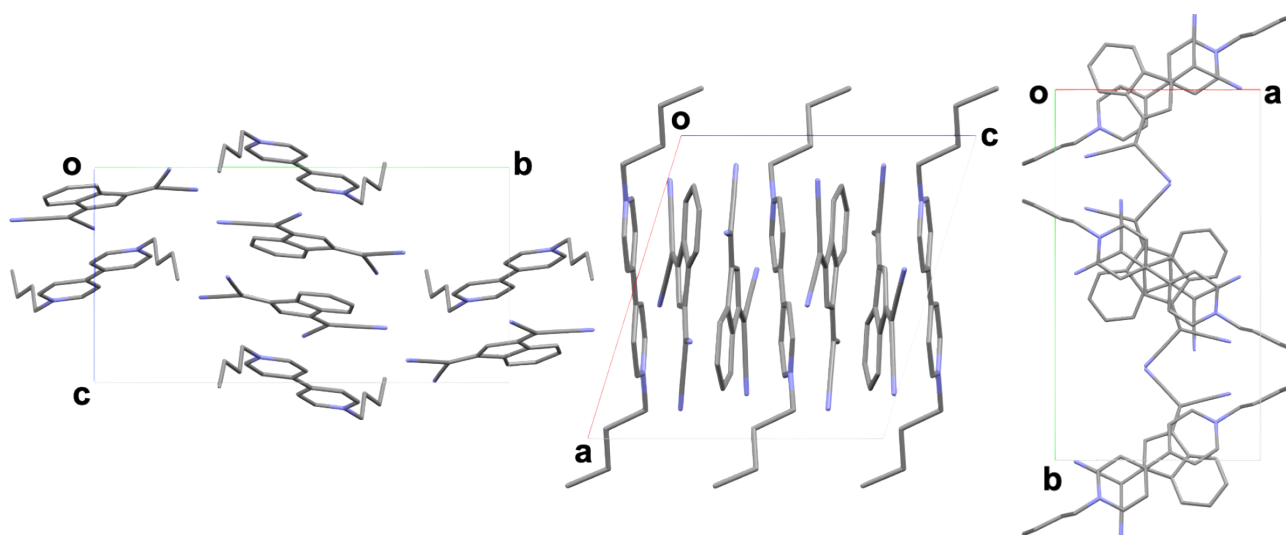

**Fig. S16** Packing diagrams (viewed along the  $a$ ,  $b$ , and  $c$  axes) of  $C4^{2+}\cdot 2CMI^-$ .

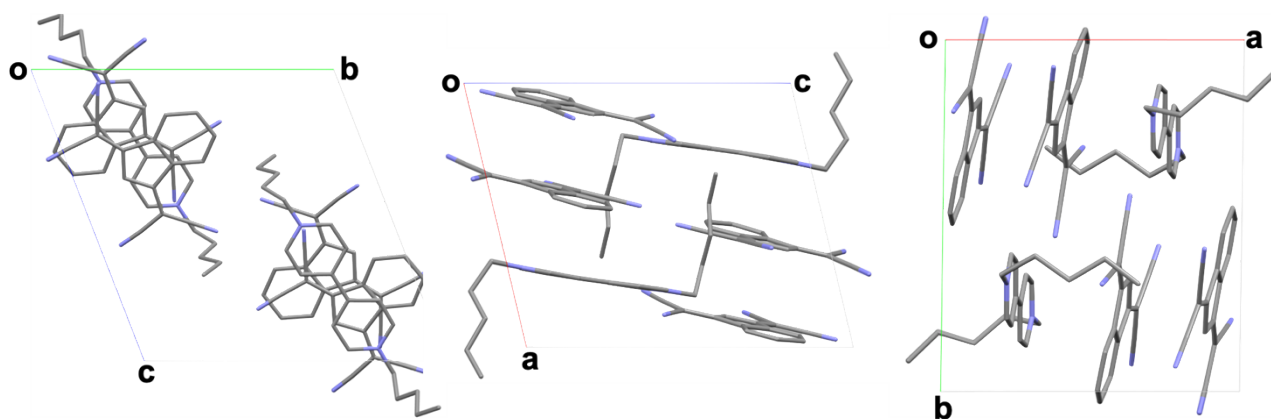

**Fig. S17** Packing diagrams (viewed along the  $a$ ,  $b$ , and  $c$  axes) of  $C5^{2+}\cdot 2CMI^-$ .

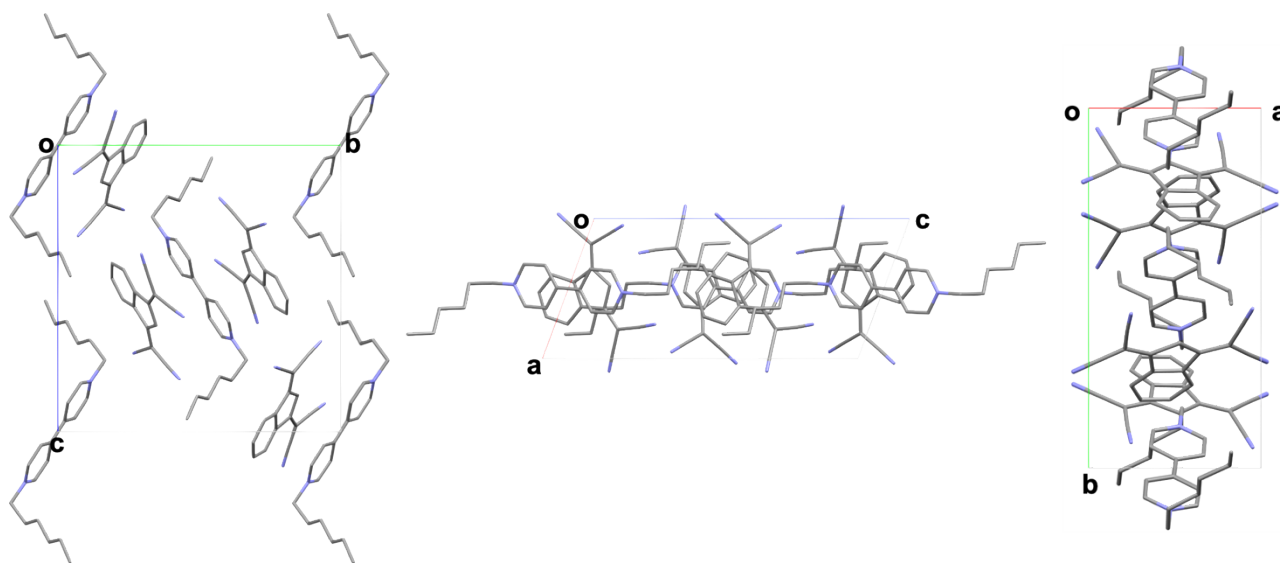

**Fig. S18** Packing diagrams (viewed along the  $a$ ,  $b$ , and  $c$  axes) of  $C6^{2+}\cdot 2CMI^-$ .

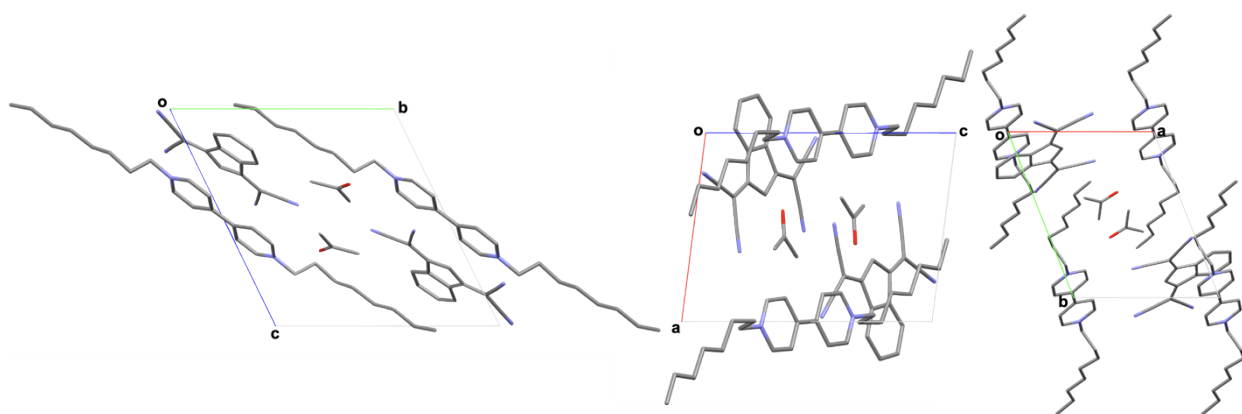

**Fig. S19** Packing diagrams (viewed along the *a*, *b*, and *c* axes) of  $C8^{2+}-2CMI^{-}$ .

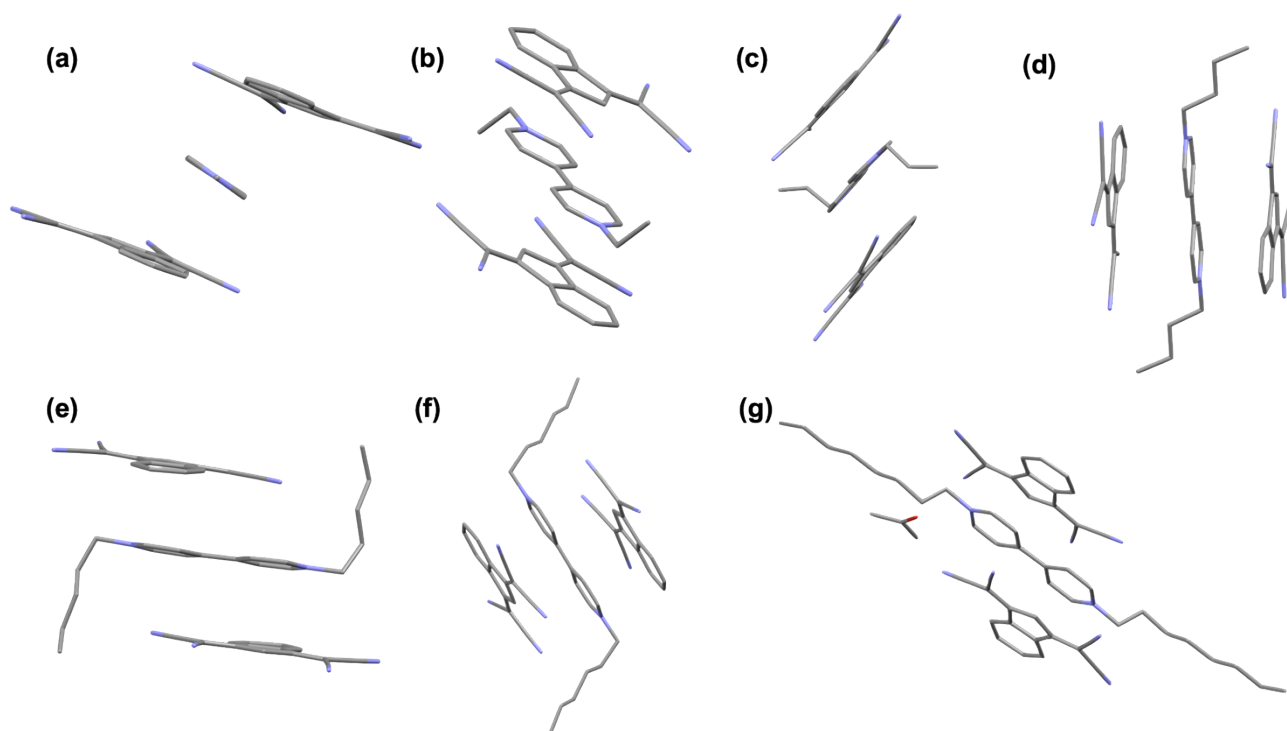

**Fig. S20** Summarize of the stacking formation (D-A-D) of ion pairs in (a)  $C1^{2+}-2CMI^{-}$ , (b)  $C2^{2+}-2CMI^{-}$ , (c)  $C3^{2+}-2CMI^{-}$ , (d)  $C4^{2+}-2CMI^{-}$ , (e)  $C5^{2+}-2CMI^{-}$ , (f)  $C6^{2+}-2CMI^{-}$  and (g)  $C8^{2+}-2CMI^{-}$ .

### 3. Optical properties

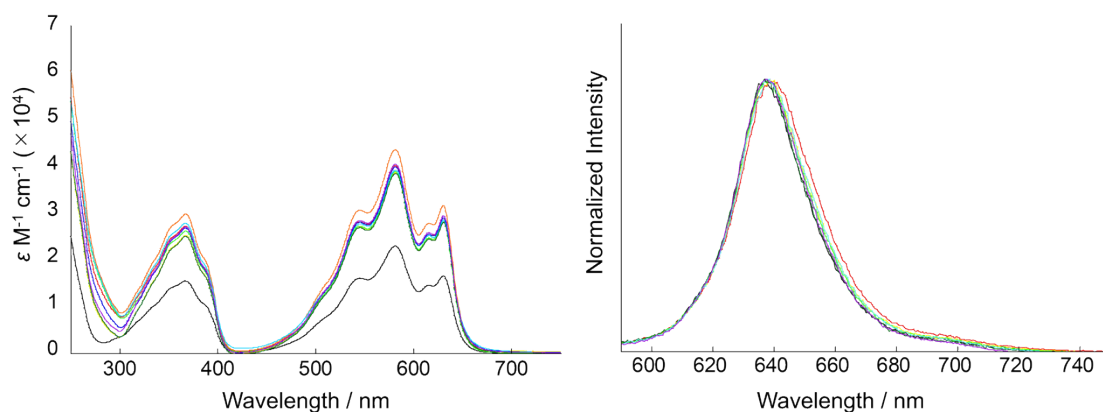

**Fig. S21** (a) UV/vis absorption and (b) fluorescence spectra ( $10^{-5}$  M in MeOH) of  $\text{Na}^+\text{-CMI}^-$  (black),  $\text{C1}^{2+}\text{-2CMI}^-$  (red),  $\text{C2}^{2+}\text{-2CMI}^-$  (orange),  $\text{C3}^{2+}\text{-2CMI}^-$  (yellow),  $\text{C4}^{2+}\text{-2CMI}^-$  (light green),  $\text{C5}^{2+}\text{-2CMI}^-$  (green),  $\text{C6}^{2+}\text{-2CMI}^-$  (blue),  $\text{C7}^{2+}\text{-2CMI}^-$  (purple) and  $\text{C8}^{2+}\text{-2CMI}^-$  (purple). The fluorescence spectra were obtained by excitation at the respective absorption maxima.

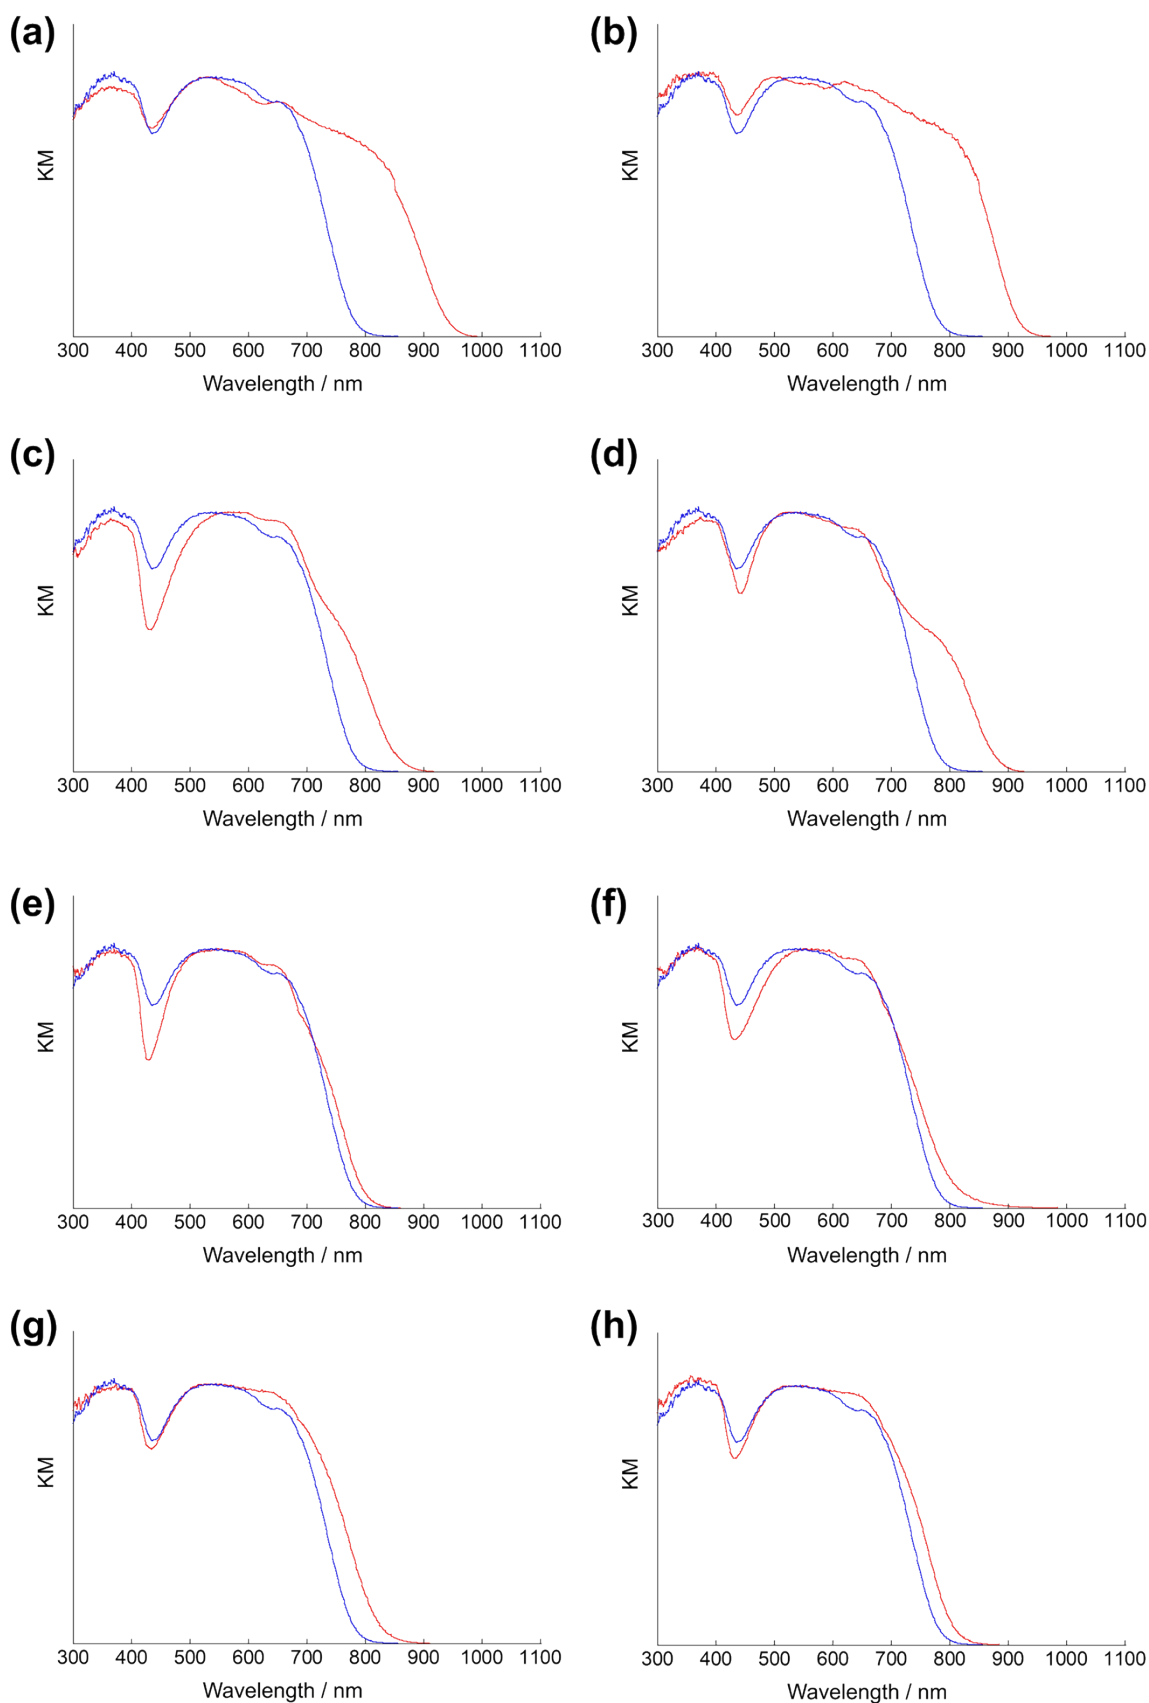

**Fig. S22** Diffuse reflectance spectra of (a)  $C1^{2+}\text{-}2CMI^-$ , (b)  $C2^{2+}\text{-}2CMI^-$ , (c)  $C3^{2+}\text{-}2CMI^-$ , (d)  $C4^{2+}\text{-}2CMI^-$ , (e)  $C5^{2+}\text{-}2CMI^-$ , (f)  $C6^{2+}\text{-}2CMI^-$ , (g)  $C7^{2+}\text{-}2CMI^-$  and (h)  $C8^{2+}\text{-}2CMI^-$  shown in red lines compared with  $Na^+\text{-}CMI^-$  shown in blue line. Notably,  $Cn^{2+}\text{-}2CMI^-$  ( $n = 1\text{--}4$ ) showed a remarkably divergent wavelength of absorption edge compared to  $Na^+\text{-}CMI^-$ . Their absorption are extended towards near-infrared, demonstrating a charge-transfer character.

## 4. Thermal properties

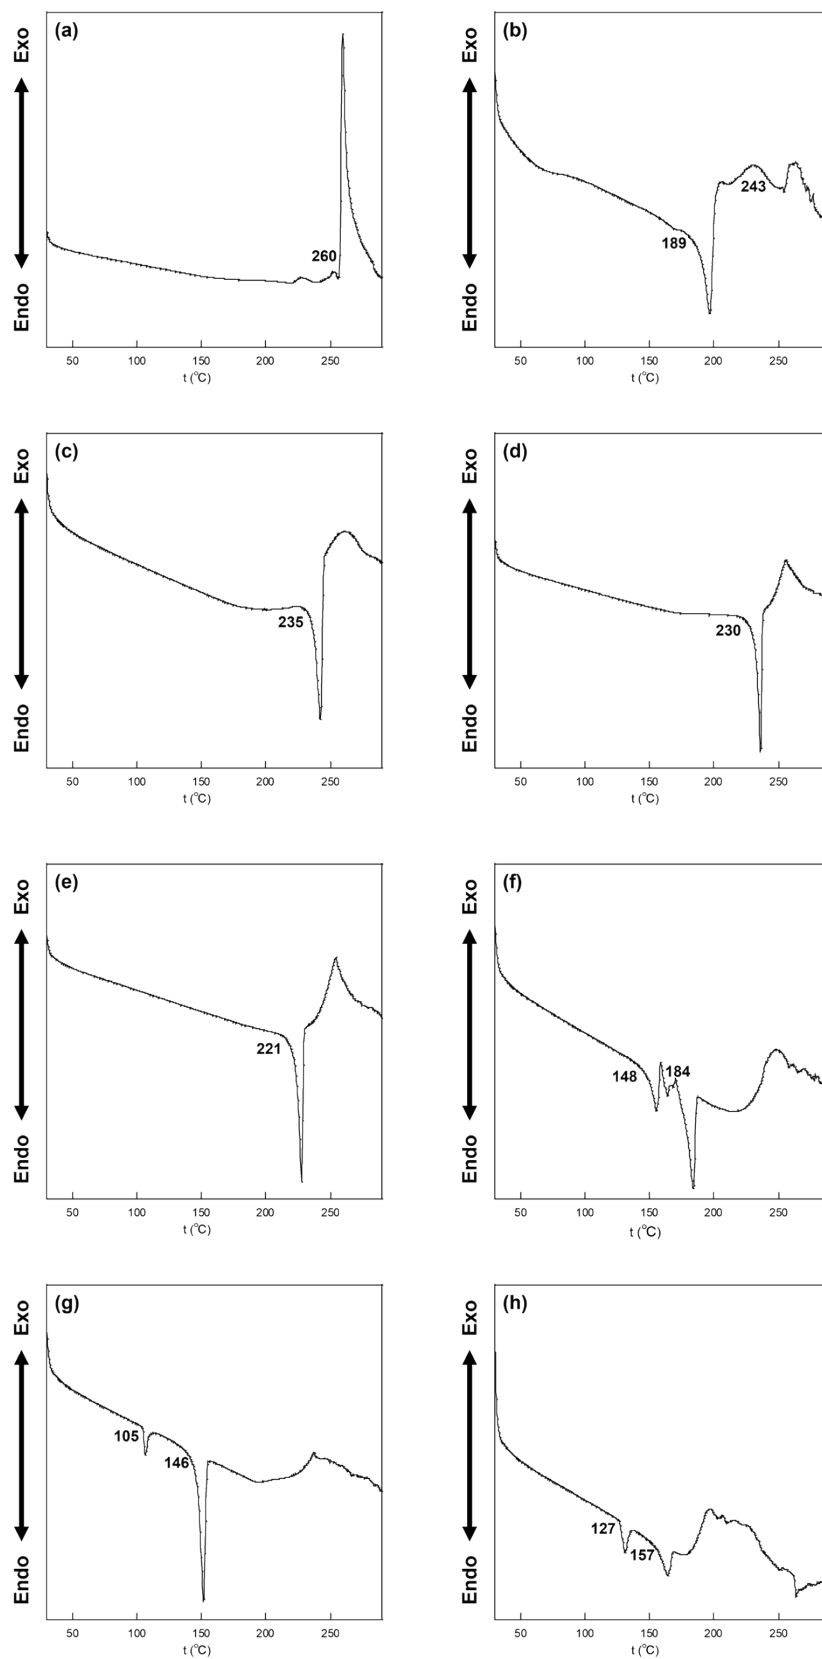

**Fig. S23** DSC thermograms of (a)  $C1^{2+}$ -2CMI<sup>-</sup>, (b)  $C2^{2+}$ -2CMI<sup>-</sup>, (c)  $C3^{2+}$ -2CMI<sup>-</sup>, (d)  $C4^{2+}$ -2CMI<sup>-</sup>, (e)  $C5^{2+}$ -2CMI<sup>-</sup>, (f)  $C6^{2+}$ -2CMI<sup>-</sup>, (g)  $C7^{2+}$ -2CMI<sup>-</sup> and (h)  $C8^{2+}$ -2CMI<sup>-</sup>. Onset temperatures (°C) of melting points are labeled.  $C1^{2+}$ -2CMI<sup>-</sup> showed an exothermic peak at 260 °C, indicating its decomposition before melting.
